# Supplementary material for: Longitudinal Liquid Biopsy and Mathematical Modeling of Clonal Evolution Forecast Time to Treatment Failure in the PROSPECT-C Phase II Colorectal Cancer Clinical Trial
Source: Oxford University Press journal article supplement (doi:10.1158/2159-8290.cd-17-0891), 2018-08-30
Supplement: 21598290cd170891-sup-187448_3_supp_4835835_pyjdyj.xlsx [file 21598290cd170891-sup-187448_3_supp_4835835_pyjdyj.xlsx]

## Sheet: Table S1
Supplementary Table S1. Tissue collection in the PROSPECT-C Trial
Trial ID	Cohort	Source	Sample ID	Method	Conc DNA (ng/ul)	Tumour (%)	Cellularity	Necrosis
1003	I	Liver metastasis (biopsy)	BL1	CT	6.54	20	1	<5%
1003	I	Liver metastasis (biopsy)	BL2	CT	5.14	60	3	0.3
1004	I	Primary Sigmoid Cancer (biopsy)	AR1	Colonoscopy	36.3	40	3	0
1004	I	Liver metastasis (biopsy)	BL1	CT	4.28	30	1	0
1007	I	Primary Rectal Cancer (biopsy)	AR1	Colonoscopy	3.2	0.1	1	0
1007	I	Liver metastasis (biopsy)	BL1	US	8.34	10	1	<5%
1007	I	Liver metastasis (biopsy)	BL2	US	21.8	20	2	10-20%
1007	I	Liver metastasis (biopsy)	PR1	US	14	20	1	20-30%
1007	I	Liver metastasis (biopsy)	PD1	US	11.3	20	2	20-30%
1008	I	Peritoenal metastasis (biopsy)	BL1	CT	7.44	10	1	0
1009	I	Primary Sigmoid Cancer (resection)	AR1	Resection	49.2	20	1	10-20%
1009	I	Liver metastasis (resection)	AR2	Resection	52	10	2	0.6
1009	I	Liver metastasis (resection)	AR3	Resection	23.6	10	2	>60%
1009	I	Liver metastasis (resection)	AR4	Resection	23.5	10	1	0.4
1009	I	Liver metastasis (resection)	AR5	Resection	36.8	10	1	0.3
1010	I	Primary Sigmoid Cancer (resection)	AR1	Resection	40.35	30	2	<5%
1010	I	Primary Sigmoid Cancer (resection)	AR2	Resection	25.6	30	3	<5%
1010	I	Liver metastasis (biopsy)	PD1	US	14.2	20	2	<5%
1010	I	Liver metastasis (biopsy)	PD2	US	8.58	20	3	5-10%
1011	I	Liver metastasis (biopsy)	BL2	US	5.78	10	1	<5%
1011	I	Liver metastasis (biopsy)	PD1	US	4.38	10	2	5-10%
1011	I	Liver metastasis (biopsy)	PD2	US	6.76	30	3	<5%
1012	I	Lung metastasis (biopsy)	BL1	CT	7.04	30	2	5-10%
1012	I	Lung metastasis (biopsy)	BL2	CT	6.04	20	2	0.3
1012	I	Lung metastasis (biopsy)	BL3	CT	3.9	20	2	0
1013	I	Liver metastasis (biopsy)	BL1	US	2.88	20	2	0.4
1013	I	Liver metastasis (biopsy)	BL2	US	3.48	20	2	0
1014	I	Ovarian metastasis (resection)	AR1	Resection	116	20	3	0.5
1014	I	Ovarian metastasis (resection)	AR2	Resection	43.8	10	1	>80%
1014	I	Liver metastasis (biopsy)	BL1	US	11.8	20	2	0.1
1014	I	Liver metastasis (biopsy)	BL2	US	9.28	40	3	0.1
1014	I	Liver metastasis (biopsy)	PR1	US	3	20	2	0.1
1014	I	Liver metastasis (biopsy)	PR2	US	7.34	20	2	0.1
1014	I	Liver metastasis (biopsy)	PD1	US	11.3	20	2	10-20%
1016	I	Liver metastasis (biopsy)	BL1	US	1.62	10	1	>90%
1016	I	Liver metastasis (biopsy)	BL2	US	0.82	20	2	0.1
1016	I	Liver metastasis (biopsy)	PD1	US	1.82	20	2	0.1
1016	I	Liver metastasis (biopsy)	PD2	US	1.39	20	2	0
1017	I	Liver metastasis (biopsy)	BL2	US	7.26	10	1	0
1018	I	Small Bowel metastasis	AR1	Resection	90	30	2	10-20%
1018	I	Small Bowel metastasis	AR2	Resection	59.1	30	2	10-20%
1018	I	Small Bowel metastasis	AR3	Resection	72.4	30	2	0.1
1018	I	Small Bowel metastasis	AR4	Resection	37.9	20	1	<10%
1018	I	Liver Metastasis (biopsy)	BL2	US	3.52	40	2	30-40%
1018	I	Pelvic mass metastasis close to IMA (biopsy)	PD1	CT	12.7	10	1	0
1019	I	Primary Colon Cancer (resection)	AR1	Resection	28.4	20	2	<10%
1019	I	Primary Colon Cancer (resection)	AR2	Resection	1.67	20	1	<10%
1019	I	Primary Colon Cancer (resection)	AR3	Resection	8.32	20	2	0
1019	I	Liver metastasis (biopsy)	BL1	US	15.4	30	2	<10%
1019	I	Liver metastasis (biopsy)	BL2	US	12.8	30	2	<10%
1020	I	Primary Sigmoid Cancer (biopsy)	AR1	Resection	2.06	10	2	<10%
1020	I	Liver metastasis (biopsy)	BL1	US	2.06	20	2	<10%
1020	I	Liver metastasis (biopsy)	BL2	US	1.08	10	1	<10%
1020	I	Liver metastasis (biopsy)	BL3	US	31.6	20	2	<10%
1020	I	Liver metastasis (biopsy)	PD1	US	25.4	20	2	0.05
1021	I	Primary Colon Cancer (resection)	AR1	Resection	18.3	20	2	<10%
1021	I	Liver metastasis (biopsy)	BL1	US	31.8	30	2	20-30%
1021	I	Liver metastasis (biopsy)	BL2	US	12.8	30	2	20-30%
1021	I	Liver metastasis (biopsy)	PD1	US	5.54	30	2	10-20%
1021	I	Liver metastasis (biopsy)	PD2	US	1.55	20	2	<10%
1022	I	Supraclavicular Node (biopsy)	BL1	US	NT	NT	NT	NT
1022	I	Supraclavicular Node (biopsy)	BL2	US	NT	NT	NT	NT
1022	I	Peritoenal Metastasis (biopsy)	PD1	CT	NT	NT	NT	NT
1022	I	Peritoenal Metastasis (biopsy)	PD2	CT	NT	NT	NT	NT
1005	II	Left posterior peliv sidewall mass	BL3	CT
1005	II	Left posterior peliv sidewall mass	PR1	CT
1018	II	Pelvic mass metastasis close to IMA (biopsy)	PD3	CT
1018	II	Pelvic mass metastasis close to IMA (biopsy)	PD4	CT
1024	II	Liver metastasis (biopsy) Seg IV	BL1	US
1024	II	Liver metastasis (biopsy) Seg IV	PR1	US
1024	II	Liver metastasis (biopsy) Seg IV	PD1	US
1026	II	Retro-caval node	BL1	CT
1026	II	Retro-caval node	PD1	CT
1038	II	Liver metastasis (biopsy) Seg IV	BL1	US
1041	II	Liver metastasis (biopsy) Seg VI-VII	BL1	US
1041	II	Liver metastasis (biopsy) Seg VI-VII	PR1	US
1041	II	Liver metastasis (biopsy) Seg VI-VII	PD1	US
1042	II	Liver metastasis (biopsy) Seg II	BL1	CT
1042	II	Liver metastasis (biopsy) Seg II	PD1	CT
1044	II	Left para-aortic node	BL1	CT
US= ultrasound; CT= computer tomography; AR= archival; BL= baseline; PR= partial response; PD= disease progression; NT= not tested

## Sheet: Table S2
Supplementary Table S2. Patients status and survival in the trial (n=45)
	N	% or 95% confidence interval
Received treatment*	45	100
Number progressed / died	45
Duration of treatment (months)	10.7
Median (min-max)	7.0 – 24.7	(2.0 – 137.3)
IQR
Best Response
PR	9	20
SD	11	24.4
PD	21	46.7
PD derived	4	8.9
Status (data cut off on 15/03/2017)
Died	42	93.3
Alive	3	6.7
Median PFS (months)		2.6 (2.0 – 4.6)
PFS rate
3 Month		46.7 (31.7 – 60.3)
6 Month		24.4 (13.2 – 37.6)
12 Month		6.7 (1.7 - 16.4)
Number died		42
Median OS (months)		8.2 (4.2 – 12.0)
OS rate
3 Month		77.8 (62.6 – 87.4)
6 Month		60.0 (44.3 – 72.6)
12 month		37.5 (23/6 – 51/4)
IQR= inter-quartile range; PR=partial response; SD=stable disease; PD progressive disease; PFS= progression free survival; OS=overall survival

## Sheet: Table S3
Supplementary Table S3. cfDNA concentration
Trial no	Cohort	Date of sample	Cycle	GE/ml (1)	GE/ml (2)	Med GE/ml	SD
1001	I	2012-12-06	Baseline	928.92	913.268	921.094	11.0676
1001	I	2013-01-22	INT	1371.07	1219.4	1295.23	107.248
1001	I	2013-02-19	INT	2504.9	2580.34	2542.62	53.3481
1001	I	2013-02-27	Progression	4704.49	4246.44	4475.47	323.892
1002	I	2013-02-20	Baseline	1218.52	1672.12	1445.32	320.74
1002	I	2013-03-19	INT	3712.68	2287.47	3000.07	1007.77
1002	I	2013-04-16	Progression	3941.8	4547.95	4244.88	428.615
1003	I	2013-09-02	BL	2881.42	3031.21	2956.32	105.918
1003	I	2013-10-01	INT
1003	I	2013-11-12	INT	1084.06	1426.02	1255.04	241.808
1003	I	2013-12-06	INT	2273.14	2654.25	2463.69	269.483
1003	I	2014-02-03	INT	2938.54	2426.33	2682.43	362.187
1003	I	2014-03-03	INT	1293.69	1520.27	1406.98	160.213
1003	I	2014-04-28	INT	44675.4	16281.9	30478.6	20077.2
1003	I	2014-05-13	INT	23516.4	42961.9	33239.2	13750.1
1003	I	2014-07-07	Progression
1004	I	2013-09-09	Baseline	2344.85	2361.78	2353.31	11.966
1004	I	2013-10-07	INT	2657.69	2806.95	2732.32	105.539
1004	I	2013-11-11	INT	4704.53	4676.6	4690.57	19.7487
1004	I	2013-12-09	Progression	4853.79	3416.77	4135.28	1016.13
1005	I	2013-10-21	Baseline	373.132	187.679	280.405	131.135
1005	I	2013-11-25	INT	19522	15071.9	17297	3146.65
1005	I	2013-12-29	INT	2491.47	1078.44	1784.96	999.159
1005	I	2014-01-27	INT	166.756	96.8477	131.802	49.4329
1005	I	2014-02-24	INT	499.237	249.42	374.328	176.648
1005	I	2014-03-21	INT	1908.25	480.718	1194.48	1009.42
1005	I	2014-04-17	INT	294.124	398.966	346.545	74.1345
1005	I	2014-05-23	INT	359.723	133.617	246.67	159.881
1005	I	2014-06-23	INT	137.831	151.59	144.711	9.72945
1005	I	2014-07-08	INT	19532.6	19036.2	19284.4	351.032
1005	I	2014-08-18	INT	15759.8	15373.1	15566.5	273.435
1005	I	2014-09-15	INT	503.487	270.024	386.755	165.083
1005	I	2014-10-14	INT	354.604	278.719	316.661	53.6584
1005	I	2014-11-25	INT
1005	I	2014-12-15	INT	1183.12	1488.73	1335.92	216.102
1005	I	2015-01-19	INT	177.689	505.327	341.508	231.675
1005	I	2015-02-16	INT
1005	I	2015-03-16	INT	2329.96	4076.66	3203.31	1235.11
1005	I	2015-04-20	INT	1063.99	942.389	1003.19	85.9838
1005	I	2015-05-19	INT
1005	I	2015-06-22	INT	646.604	966.359	806.481	226.101
1005	I	2015-08-17	INT	1671.36	2085.01	1878.19	292.496
1005	I	2015-09-14	INT
1005	I	2015-11-03	INT
1005	I	2015-11-30	INT	485.168	332.504	408.836	107.95
1005	I	2016-01-04	INT	1121.99	1080.39	1101.19	29.414
1005	I	2016-02-01	INT	3488.87	3340.54	3414.71	104.88
1005	I	2016-02-29	INT	1971.35	2274.83	2123.09	214.591
1005	I	2016-03-30	INT	1405.13	1326.77	1365.95	55.4119
1005	I	2016-04-25	INT	6897.65	6823.93	6860.79	52.1333
1005	I	2016-05-23	Progression	4091.94	4247.35	4169.64	109.894
1006	I	2013-10-14	Baseline	2104.11	1480.39	1792.25	441.037
1006	I	2013-11-13	INT	982.289	240.61	611.45	524.446
1006	I	2013-12-11	INT	8017.11	60.7025	4038.91	5626.03
1006	I	2013-12-31	Progression	5087.88	3099.17	4093.53	1406.23
1007	I	2013-10-14	Baseline	1670.05	805.438	1237.74	611.373
1007	I	2013-11-14	INT	433.963	322.102	378.032	79.0975
1007	I	2013-12-10	INT	31146.8	25822.5	28484.6	3764.85
1007	I	2014-01-07	INT	2241.13	15.1972	1128.16	1573.97
1007	I	2014-01-21	INT	195.894	4.07427	99.9841	135.637
1007	I	2014-02-18	INT	49.8733	3.2251	26.5492	32.9853
1007	I	20.3.2014	INT	542.809	298.125	420.467	173.018
1007	I	17.4.2014	INT	1383.18	271.04	827.111	786.403
1007	I	15.5.2014	INT	710.191	392.329	551.26	224.762
1007	I	29.05.2014	INT	543.419	764.063	653.741	156.019
1007	I	26.6.2014	INT	502.887	676.532	589.71	122.785
1007	I	10.07.14	Progression	2625.04	1674.42	2149.73	672.189
1008	I	2013-10-18	Baseline	3950.95	926.795	2438.87	2138.4
1008	I	2013-11-15	INT	2736.64	1861.04	2298.84	619.143
1008	I	2013-12-09	Progression	36825.6	29447.1	33136.3	5217.34
1009	I	2013-11-25	Baseline	8761.47	10151.7	9456.61	983.064
1009	I	2013-12-23	INT	5153.73	4680.88	4917.3	334.355
1009	I	2014-01-21	INT	1795.64	1602.35	1698.99	136.678
1009	I	2014-02-18	INT	5155.1	8925.33	7040.22	2665.95
1009	I	2014-03-18	INT	17866.2	13854.6	15860.4	2836.63
1009	I	2014-04-07	Progression	31830.6	30018.7	30924.6	1281.19
1010	I	2013-12-10	Baseline	5037.38	5413.07	5225.22	265.652
1010	I	2014-01-10	INT	3505.61	2956.19	3230.9	388.501
1010	I	2014-02-07	INT	544.409	514.194	529.302	21.3646
1010	I	2014-03-07	INT	876.432	541.654	709.043	236.724
1010	I	2014-04-04	INT	276472	273192	274832	2318.98
1010	I	2014-05-09	INT	17587.1	1644.54	9615.8	11273.1
1010	I	2014-06-04	INT	17264.5	11426.3	14345.4	4128.26
1010	I	2014-07-16	Progression	656.602	874.827	765.715	154.308
1011	I	2014-01-15	Baseline	1550	1894.47	1722.24	243.579
1011	I	2014-02-17	INT	1894.47	3788.46	2841.47	1339.25
1011	I	2014-03-13	Progression	42611.6	41226.6	41919.1	979.364
1012	I	2014-02-14	Baseline	6910.6	6233.53	6572.06	478.759
1012	I	2014-03-17	INT/Progression	6313.72	5522.25	5917.99	559.654
1013	I	2014-02-21	Baseline	883.465	1609.5	1246.48	513.384
1014	I	2014-04-08	INT	5955.23	5869.46	5912.35	60.6495
1014	I	2014-05-19	INT	2005.73	2751.09	2378.41	527.046
1014	I	04.06/2014	INT	2652.06	2410.36	2531.21	170.907
1014	I	30.06.2014	INT	501.078	347.103	424.09	108.876
1014	I	28.07.2014	INT	294.384	847.608	570.996	391.189
1014	I	2014-08-22	Progression	3425.18	3946.74	3685.96	368.798
1016	I	2014-04-07	Baseline	3862.32	3559.83	3711.08	213.897
1016	I	2014-05-23	INT	3841.75	3418.31	3630.03	299.422
1016	I	2014-06-02	Progression	10066.3	21624.1	15845.2	8172.6
1017	I	2014-04-07	Baseline	12731.7	13073.5	12902.6	241.655
1017	I	2014-05-08	INT	20368.9	19815	20091.9	391.674
1017	I	2014-06-03	INT	31064.2	30397.4	30730.8	471.509
1017	I	2014-07-04	Progression	23319.5	12415.2	17867.3	7710.5
1018	I	2014-04-14	Baseline	1954.76	1805.48	1880.12	105.554
1018	I	2014-05-12	INT	80377	86201.3	83289.1	4118.45
1018	I	2014-05-23	INT	253.567	2.1554	127.861	177.775
1018	I	2014-06-23	INT	663.28	849.516	756.398	131.688
1018	I	2014-08-19	INT	873.154	564.239	718.696	218.436
1018	I	2014-09-08	INT
1018	I	2014-10-22	INT	1502.24	96.2191	799.229	994.206
1018	I	2014-11-06	INT
1018	I	2015-12-08	INT	985.655	990.11	987.882	3.15022
1018	I	2015-01-09	INT	546.433	752.54	649.486	145.74
1018	I	2015-02-12	INT	526.122	1112.04	819.083	414.309
1018	I	2015-03-12	INT	260.592	347.232	303.912	61.2635
1018	I	2015-04-09	INT	370.578	602.61	486.594	164.071
1018	I	2015-05-11	INT	316.766	899.847	608.307	412.3
1018	I	2015-06-09	INT	1458.29	2785.67	2121.98	938.598
1018	I	2015-07-07	INT	1142.59	2278.92	1710.76	803.501
1018	I	2015-08-04	INT	2128.65	2803.44	2466.04	477.147
1018	I	2015-09-09	Progression	2804.32	5079.82	3942.07	1609.02
1019	I	2014-04-16	Baseline	510.454	232.005	371.23	196.893
1019	I	2014-05-12	INT	1541.2	2196.66	1868.93	463.478
1019	I	2014-06-11	Progression	562.802	471.045	516.924	64.8824
1020	I	2014-04-22	Baseline	2681.31	1965.63	2323.47	506.065
1020	I	2014-05-21	INT	1378.37	1398.2	1388.28	14.0176
1020	I	2014-06-24	INT	476.089	315.006	395.547	113.903
1020	I	2014-07-22	INT	911.331	903.348	907.339	5.64458
1020	I	2014-08-19	INT	1143.83	1295.75	1219.79	107.42
1020	I	2014-09-08	Progression	699.777	52.2481	376.012	457.872
1021	I	2014-04-17	Baseline	123.136	3.08419	63.11	84.8893
1021	I	2014-05-21	INT	4937.47	6869.18	5903.32	1365.93
1021	I	2014-06-18	INT	2653.72	2126.57	2390.14	372.757
1021	I	2014-07-16	INT	2621.28	2991.71	2806.49	261.933
1021	I	2014-08-14	Progression	2062.48	1855.67	1959.08	146.236
1021	I	2014-08-18	Progression	1725.04	2077.5	1901.27	249.227
1022	I	2014-05-08	Baseline	1510.73	1179.77	1345.25	234.021
1022	I	2014-07-03	INT	1080.54	1208.36	1144.45	90.3809
1022	I	2014-07-25	INT	2772.8	2737.4	2755.1	25.0364
1022	I	2014-08-15	Progression	1587.39	1790.87	1689.13	143.881
1023	I	2014-06-27	Baseline	3862.32	3559.83	3711.08	213.897
1023	I	2014-07-25	INT	15621.8	12768	14194.9	2017.95
1023	I	2014-09-01	INT
1023	I	2014-09-12	Progression	7538.15	6750.78	7144.47	556.749
Red squares indicate samples failed due to haemolysis or failed quality control. cfDNA= cell free DNA; INT= intermediate sample.
Trial no	Cohort	Cycle	Conc. Ng/ul
1005	II	Baseline	3.61
1005	II	INT	3.96
1005	II	Progression	0.657
1018	II	Progression	0.48
1024	II	Baseline	3.68
1024	II	INT	7.43
1024	II	Progression	0.338
1038	II	Baseline	2.96
1038	II	INT	0.476
1038	II	Progression	0.336
1041	II	Baseline	0.65
1041	II	INT	6.87
1041	II	Progression	0.154
1044	II	Baseline	1.01
1044	II	INT	2
1044	II	INT	2.41
1044	II	Progression	0.437
1026	II	Progression	0.075
1028	II	Progression	1.75
1042	II	Progression	2.11
Red squares indicate samples failed due to haemolysis or failed quality control. INT= intermediate sample.

## Sheet: Table S5
Supplementary Table S5. Avenio cfDNA NGS results
Trial ID	Time-point	Position Hg38	Variant	VAF [%]	Annotation	Consequence	Unique Depth	Exon
1005	Baseline	chr17:7674872	TP53	0.19	c.659A>G	p.Tyr220Cys	5 of 4133	6 of 11
1005	Baseline	chr17:7675223	TP53	15.55	c.389T>A	p.Leu130His	454 of 2919	5 of 11
1005	INT		None
1005	INT		None
1005	Progression	chr13:28027097	FLT3	0.53	c.2198C>A	p.Pro733Gln	20/3783	17/24
1005	Progression	chr12:25245351	KRAS	0.29	c.34G>T	p.Gly12Cys	12 of 4083	2 of 6
1005	Progression	chr1:114713909	NRAS	1.76	c.181C>A	p.Gln61Lys	67 / 3805	3 of 7
1005	Progression	chr7:5986813	PMS2	0.94	c.1952A>G	p.Lys651Arg	43 / 4589	11 of 15
1005	Progression	chr17:7675223	TP53	4.39	c.389T>A	p.Leu130His	136 / 3095	5 of 11
1018	Progression	chr4:152326137	FBXW7	14.53	c.1513C>T	p.Arg505Cys	1043 / 7178	10 of 12
1018	Progression	chr3:179203761	PIK3CA	13.96	c.1031T>G	p.Val344Gly	870 / 6233	5 of 21
1018	Progression	chr7:5986813	PMS2	0.69	c.1952A>G	p.Lys651Arg	61/8850	11 of 15
1018	Progression	chr17:7674221	TP53	18.48	c.742C>T	p.Arg248Trp	1543/8351	7 of 11
1024	Baseline	chr13:28027097	FLT3	1.08	c.2198C>A	p.Pro733Gln	23 of 2127	17 of 24
1024	Baseline	chr3:10146612	VHL	0.1	c.440delT	p.Phe148fs	1 of 953	2 of 3
1024	INT	chr5:112792494	APC	0.05	c.694C>T	p.Arg232*	3 of 6611	7 of 16
1024	INT	chr13:28027097	FLT3	0.51	c.2198C>A	p.Pro733Gln	43 of 8370	17 of 24
1024	Progression	chr5:112792494	APC	25.71	c.694C>T	p.Arg232*	1047/4072	7 of 16
1024	Progression	chr13:28018484	FLT3	0.01	c.2524T>C	p.Tyr842His	4/44665	20 of 24
1024	Progression	chr13:28027097	FLT3	90.38	c.2198C>A	p.Pro733Gln	32877/36377	17 of 24
1024	Progression	chr4:55090038	KDR	21.72	c.3110C>T	p.Ser1037Leu	1131/5208	23 of 30
1024	Progression	chr3:179203761	PIK3CA	41.02	c.1031T>G	p.Val344Gly	2088/5090	5 of 21
1024	Progression	chr7:5986813	PMS2	0.31	c.1952A>G	p.Lys651Arg	30/9541	11 of 15
1024	Progression	chr7:6002539	PMS2	11.29	c.451C>T	p.Arg151Cys	671/5944	5 of 15
1024	Progression	chr17:7674221	TP53	37.92	c.742C>T	p.Arg248Trp	1867/4923	7 of 11
1024	Progression	chr7:55019022-55256620	EGFR amp
1024	Progression	chr7:116672391-116798386	MET amp
1026	Progression	sample failed analysis
1028	Baseline	sample failed analysis
1029	Baseline	chr7:55156814	EGFR	0.05	c.1189A>C	p.Thr397Pro	3 of 6594	10 of 28
1029	Baseline	chr17:7674252	TP53	0.06	c.711G>C	p.Met237Ile	9 of 13920	7 of 11
1032	Baseline	chr1:162755210	DDR2	0.29	c.472C>T	p.Pro158Ser	22 of 7482	7 of 19
1032	Baseline	chr10:43113656	RET	28.91	c.1860C>T	p.Cys620Cys	1562 of 5403	10 of 19
1032	Baseline	chr12:25245350	KRAS	0.4137	c.35G>A	p.Gly12Asp	1809 of 4373	2 of 6
1032	Baseline	chr3:179218303	PIK3CA	0.4527	c.1633G>A	p.Glu545Lys	1910 of 4219	10 of 21
1032	Baseline	chr4:54698424	KIT	0.0015	c.478T>G	p.Leu160Val	8 of 5177	3 of 21
1032	Baseline	chr5:112839474	APC	0.3963	c.3880C>T	p.Gln1294*	1357 of 3424	16 of 16
1032	Baseline	chr7:116741014	MET	0.0007	c.1690G>A	p.Ala564Thr	10 of 13817	5 of 21
1032	Baseline	chrX:67721954	AR	0.0007	c.2440T>G	p.Phe814Val	4 of 5748	6 of 8
1032	Baseline	chr17:39687915-39730426	ERBB2 amp
1033	Baseline	chr10:121551307	FGFR2	0.0003	c.607C>T	p.Arg203Cys	3 of 9033	5 of 18
1033	Baseline	chr12:25245332	KRAS	0.2252	c.53C>A	p.Ala18Asp	1643 of 7297	2 of 6
1033	Baseline	chr18:51065560	SMAD4	0.0579	c.1093G>C	p.Gly365Arg	309 of 5340	9 of 12
1033	Baseline	chr5:112839661	APC	0.0429	c.4067C>G	p.Ser1356*	227 of 5286	16 of 16
1033	Baseline	chr7:55155916	EGFR	0.0012	c.976T>C	p.Cys326Arg	9 of 7423	8 of 28
1034	Baseline	chr7:140753336	BRAF	26.64	c.1799T>A	p.Val600Glu	397 of 1490	15 of 18
1034	Baseline	chr12:25245351	KRAS	0.11	c.34G>C	p.Gly12Arg	2 of 1896	2 of 6
1035	Baseline	chr7:140753336	BRAF	0.29	c.1799T>A	p.Val600Glu	11 of 3812	15 of 18
1035	Baseline	chr20:58909366	GNAS	0.14	c.605G>A	p.Arg202His	8 of 5610	8 of 13
1038	Baseline	chr5:112838652	APC	14.55	c.3058G>T	p.Glu1020*	333 of 2288	16 of 16
1038	Baseline	chr17:7674221	TP53	30.56	c.742C>T	p.Arg248Trp	3154 of 10320	7 of 11
1038	INT	chr5:112838652	APC	0.5	c.3058G>T	p.Glu1020*	12 of 2408	16 of 16
1038	INT	chr17:7674221	TP53	0.98	c.742C>T	p.Arg248Trp	76 of 7755	7 of 11
1038	INT	chr7:116672391-116798386	MET amp
1038	Progression	chr5:112838652	APC	9.21	c.3058G>T	p.Glu1020*	138/1498	16 of 16
1038	Progression	chr7:140753336	BRAF	0.27	c.1799T>A	p.Val600Glu	4/1455	15 of 18
1038	Progression	chr7:5986813	PMS2	1.22	c.1952A>G	p.Lys651Arg	34/2789	11 of 15
1038	Progression	chr17:7674221	TP53	20.22	c.742C>T	p.Arg248Trp	457/2260	7 of 11
1038	Progression	chr7:116672391-116798386	MET amp
1039	Baseline	chr3:41233763	CTNNB1	0.13	c.1420C>T	p.Arg474*	11 of 8312	9 of 15
1039	Baseline	chr7:6004056	PMS2	47.67	c.166C>G	p.Leu56Val	950 of 1993	3 of 15
1039	Baseline	chr17:39687915-39730426	ERBB2 amp
1040	Baseline	chr7:140753336	BRAF	0.83	c.1799T>A	p.Val600Glu	10 of 1208	15 of 18
1041	Baseline	chr2:29532108	ALK	0.21	c.961C>A	p.Leu321Ile	13 of 6055	4 of 29
1041	Baseline	chr5:112838934	APC	32.35	c.3340C>T	p.Arg1114*	988 of 3054	16 of 16
1041	INT	chr5:112838934	APC	3.16	c.3340C>T	p.Arg1114*	134 of 4242	16 of 16
1041	INT	chr7:55174015	EGFR	0.02	c.2156G>C	p.Gly719Ala	3 of 14972	18 of 28
1041	Progression	chr5:112838934	APC	20.55	c.3340C>T	p.Arg1114*	261/1270	16 of 16
1041	Progression	chr3:179218306	PIK3CA	0.39	c.1636C>A	p.Gln546Lys	5/1286	10 of 21
1041	Progression	chr7:5986813	PMS2	1.57	c.1952A>G	p.Lys651Arg	31/1972	11 of 15
1041	Progression	chr7:116672391-116798386	MET amp
1042	Progression	sample failed analysis
1043	Baseline	chr7:140753336	BRAF	1.93	c.1799T>A	p.Val600Glu	41 of 2128	15 of 18
1043	Baseline	chr17:7674886	TP53	1.52	c.645T>G	p.Ser215Arg	42 of 2764	6 of 11
1043	Baseline	chr17:7674887	TP53	1.26	c.644G>A	p.Ser215Asn	35 of 2785	6 of 11
1043	Baseline	chr17:39687915-39730426	ERBB2 amp
1043	Baseline	chr7:116672391-116798386	MET amp
1044	Baseline	chr5:112780895	APC	1.17	c.637C>T	p.Arg213*	40 of 3413	6 of 16
1044	Baseline	chr5:112827194	APC	2.95	c.1495C>T	p.Arg499*	96 of 3257	12 of 16
1044	Baseline	chr5:112839693	APC	2.8	c.4099C>T	p.Gln1367*	121/4329	16 of 16
1044	Baseline	chr17:7673776	TP53	2.61	c.844C>T	p.Arg282Trp	185 of 7080	8 of 11
1044	INT 1	chr5:112827194	APC	0.1	c.1495C>T	p.Arg499*	4 of 4135	12 of 16
1044	INT 1	chr5:112839693	APC	0.12	c.4099C>T	p.Gln1367*	6 of 5170	16 of 16
1044	INT 1	chr10:87961054	PTEN	0.14	c.962_963insA	p.Asn323fs	2 of 1478	8 of 9
1044	INT 1	chr18:51076662	SMAD4	0.06	c.1333C>T	p.Arg445*	6 of 10680	11 of 12
1044	INT 2	chr5:112780895	APC	0.44	c.637C>T	p.Arg213*	14 of 3209	6 of 16
1044	INT 2	chr5:112839693	APC	0.31	c.4099C>T	p.Gln1367*	15 of 4785	16 of 16
1044	INT 2	chr17:7673776	TP53	0.56	c.844C>T	p.Arg282Trp	46 of 8278	8 of 11
1044	Progression	chr5:112780895	APC	1.39	c.637C>T	p.Arg213*	81/5847	6 of 16
1044	Progression	chr5:112827194	APC	3.21	c.1495C>T	p.Arg499*	186/5789	12 of 16
1044	Progression	chr5:112839693	APC	3.07	c.4099C>T	p.Gln1367*	147/4796	16 of 16
1044	Progression	chr7:140753336	BRAF	0.19	c.1799T>A	p.Val600Glu	11 of 5697	15 of 18
1044	Progression	chr7:55160233	EGFR	0.53	c.1393G>A	p.Gly465Arg	34/6376	12 of 28
1044	Progression	chr12:25227341	KRAS	0.2	c.183A>C	p.Gln61His	12 of 5861	3 of 6
1044	Progression	chr12:25245351	KRAS	0.04	c.34G>T	p.Gly12Cys	2 of 5511	2 of 6
1044	Progression	chr15:66436815	MAP2K1	0.04	c.361T>A	p.Cys121Ser	02 of 5535	3 of 11
1044	Progression	chr1:114713909	NRAS	0.03	p.Gln61Lys	p.Gln61Lys	2 of 6376	3 of 7
1044	Progression	chr7:5986813	PMS2	0.31	c.1952A>G	p.Lys651Arg	21/6718	11 of 15
1044	Progression	chr17:7673776	TP53	4.21	c.844C>T	p.Arg282Trp	193/4579	8 of 11
1045	Baseline	chr17:7674917	TP53	19.07	c.614A>G	p.Tyr205Cys	1925 of 10093	6 of 11
1045	Baseline	chr7:55019022-55256620	EGFR amp
1045	Progression	chr17:7674917	TP53	47.35	c.614A>G	p.Tyr205Cys	678 of 1432	6 of 11
1045	Progression	chr7:55019022-55256620	EGFR amp
1046	Baseline	chr17:7673763	TP53	41.05	c.857A>T	p.Glu286Val	2197 of 5352	8 of 11
1047	Baseline	chr7:140753336	BRAF	8.88	c.1799T>A	p.Val600Glu	879 of 9899	15 of 18
1047	Baseline	chr1:162775798	DDR2	0.07	c.2003G>A	p.Arg668His	11 of 15671	16 of 19
1047	Baseline	chr1:97082391	DPYD	45.93	c.2846A>T	p.Asp949Val	4331 of 9430	22 of 23
1047	Baseline	chr2:208248389	IDH1	8.45	c.394C>T	p.Arg132Cys	875 of 10358	4 of 10
1047	Baseline	chr4:54267363	PDGFRA	0.25	c.834C>T	p.Pro278Pro	31 of 12390	6 of 23
1047	Baseline	chr9:95456391	PTCH1	0.11	c.3191C>T	p.Thr1064Met	12 of 11182	19 of 24
1047	Baseline	chr10:87933043	PTEN	7.18	c.284C>T	p.Pro95Leu	502 of 6987	5 of 9
cfDNA= cell-free DNA; INT= intermediate; VAF= variant allele frequency

## Sheet: Table S6
Supplementary Table S6. Fractional Abundance of RAS pathway aberrations detected by ddPCR in tissue biopsies
Trial ID	Time-point	Target	Concentration	CopiesPer20uLWell	Conc in 1µL used	Positives	FA (%)	Negatives	AcceptedDroplets	TotalConfMin	PoissonConfMax	PoissonConfMin	Ch1+Ch2+	Ch1+Ch2-	Ch1-Ch2+	Ch1-Ch2-	Linkage	CNV	TotalCNVMax	TotalCNVMin	PoissonCNVMax	PoissonCNVMin	ReferenceCopies	UnknownCopies	Ratio	TotalRatioMax	TotalRatioMin	PoissonRatioMax	PoissonRatioMin	FractionalAbundance	TotalFractionalAbundanceMax	TotalFractionalAbundanceMin	PoissonFractionalAbundanceMax	PoissonFractionalAbundanceMin	ReferenceAssayNumber	TargetAssayNumber	Threshold	MeanAmplitudeofPositives	MeanAmplitudeofNegatives	MeanAmplitudeTotal	ExperimentComments	MergedWells	TotalConfMax68	TotalConfMin68	PoissonConfMax68	PoissonConfMin68	TotalCNVMax68	TotalCNVMin68	PoissonCNVMax68
1003	BL1	KRAS G12D	0.2	4	6.54	2	0.160514	11536	11538		0.65	0.03	1	1	1243	10293	0.0897								0.0015			0.0038	0	0.15			0.38	0	1	1	2016	6765.5	996.61	997.61					0.39	0.09
1003		KRAS wt	134	2680		1244		10294	11538		142	127	1	1	1243	10293	0.0897								0.0015			0.0038	0	0.15			0.38	0	1	1	2006	4554.2	1252.4	1608.4					138	130.4
1003	BL1	KRAS Q61H	0.1	2	6.54	1	0.159744	11343	11344		0.5	0	0	1	625	10718	0								0.0016			0.0052	0	0.16			0.52	0	1	1	2967	6364.1	1347.2	1347.6					0.26	0.03
1003		KRAS wt	67	1340		625		10719	11344		72	61	0	1	625	10718	0								0.0016			0.0052	0	0.16			0.52	0	1	1	3534	5471.8	1583.9	1798.1					69.3	64
1003	BL1	KRAS G13D	0.35	7	6.54	4	0.175593	13363	13367		0.83	0.11	3	1	2271	11092	0.246								0.0016			0.0033	0	0.16			0.32	0	1	1	997	1541.9	495.87	496.18					0.56	0.2
1003		KRAS wt	219	4380		2274		11093	13367		228	210	3	1	2271	11092	0.246								0.0016			0.0033	0	0.16			0.32	0	1	1	1993	3846.1	1209.5	1658					224	214.8
1004	AR1	KRAS G12D	0.4	8	36.3	4	0.176757	11734	11738		0.95	0.12	3	1	2256	9478	0.277								0.0016			0.0032	0	0.16			0.32	0	1	1	2016	4579.9	1031.4	1032.6					0.64	0.23
1004		KRAS wt	251	5020		2259		9479	11738		262	241	3	1	2256	9478	0.277								0.0016			0.0032	0	0.16			0.32	0	1	1	2006	4654.2	1271	1922.1					257	246
1004	AR1	KRAS G13D	0.7	14	36.3	7	0.214856	12339	12346		1.3	0.3	5	2	3246	9093	0.408								0.0019			0.0033	0.0004	0.19			0.33	0.04	1	1	997	1703.7	508.71	509.38					0.95	0.44
1004		KRAS wt	360	7200		3251		9095	12346		372	347	5	2	3246	9093	0.408								0.0019			0.0033	0.0004	0.19			0.33	0.04	1	1	1993	4010.8	1235.1	1966					366	353
1004	BL1	KRAS G12D	0.19	3.8	4.28	2	0.342466	12279	12281		0.61	0.03	1	1	581	11698	0.091								0.0034			0.0085	0	0.33			0.84	0	1	1	2016	4964.6	997.05	997.7					0.37	0.08
1004		KRAS wt	57.1	1142		582		11699	12281		61.8	52.5	1	1	581	11698	0.091								0.0034			0.0085	0	0.33			0.84	0	1	1	2006	4549.9	1266.6	1422.2					59.5	54.8
1004	BL1	KRAS G13D	0.1	2	4.28	1	0.211416	12365	12366		0.45	0	0	1	472	11893	0								0.0021			0.007	0	0.21			0.7	0	1	1	997	3130.9	479.33	479.54					0.24	0.03
1004		KRAS wt	45.8	916		472		11894	12366		49.9	41.7	0	1	472	11893	0								0.0021			0.007	0	0.21			0.7	0	1	1	1993	3870.3	1192.3	1294.6					47.9	43.7
1007	AR1	KRAS G12D	0.1	2	3.2	1	0.143678	12281	12282		0.46	0	0	1	695	11586	0								0.0014			0.0047	0	0.14			0.47	0	1	1	2016	5777.7	962.4	962.8					0.24	0.03
1007		KRAS wt	69	1380		695		11587	12282		74	63	0	1	695	11586	0								0.0014			0.0047	0	0.14			0.47	0	1	1	2006	4274.3	1210.6	1384					71.1	65.9
1007	AR1	KRAS Q61H	0	0	3.2	0	0	12022	12022		0.29	0	0	0	407	11615	0																		1	1	2967	0	1321.6	1321.6					0.13	0
1007		KRAS wt	40.5	810		407		11615	12022		44.5	36.6	0	0	407	11615	0																		1	1	3534	5450.3	1564	1695.6					42.5	38.5
1007	BL2	KRAS Q61H	0	0	21.8	0	0	12192	12192		0.29	0	0	0	3521	8671	0																		1	1	2967	0	1428.5	1428.5					0.13	0
1007		KRAS wt	401	8020		3521		8671	12192		414	388	0	0	3521	8671	0																		1	1	3534	5482.6	1561.7	2694					408	394
1007	BL2	KRAS G12D	0.22	4.4	21.8	2	0.102197	10824	10826		0.7	0.03	1	1	1954	8870	0.0847								0.0009			0.0023	0	0.09			0.23	0	1	1	2016	4752.9	1015.2	1015.8					0.42	0.09
1007		KRAS wt	234	4680		1955		8871	10826		245	224	1	1	1954	8870	0.0847								0.0009			0.0023	0	0.09			0.23	0	1	1	2006	4558	1255.4	1851.8					240	229
1007	PR1	KRAS G12D	0.21	4.2	14	2	0.153965	11157	11159		0.68	0.03	2	0	1295	9862	0.211								0.0015			0.0037	0	0.14			0.37	0	1	1	2016	5737.6	1003.4	1004.2					0.41	0.09
1007		KRAS wt	145	2900		1297		9862	11159		153	137	2	0	1295	9862	0.211								0.0015			0.0037	0	0.14			0.37	0	1	1	2006	4598.3	1259.8	1647.8					149.4	141.3
1007	PR1	KRAS Q61H	0	0	14	0	0	14592	14592		0.24	0	0	0	1174	13418	0																		1	1	2967	0	1324.8	1324.8					0.11	0
1007		KRAS wt	99	1980		1174		13418	14592		104	93	0	0	1174	13418	0																		1	1	3534	5472	1550.7	1866.2					101.6	95.8
1007	PD1	KRAS Q61H	0	0	11.3	0	0	9685	9685		0.36	0	0	0	660	9025	0																		1	1	2967	0	1351.1	1351.1					0.17	0
1007		KRAS wt	83	1660		660		9025	9685		89	77	0	0	660	9025	0																		1	1	3534	5517.9	1580.2	1848.6					86.3	79.8
1007	PD1	KRAS G12D	0.3	6	11.3	3	0.367197	11608	11611		0.81	0.07	2	1	812	10796	0.195								0.0036			0.0079	0	0.35			0.78	0	1	1	2016	5037.5	999.15	1000.2					0.52	0.16
1007		KRAS wt	86	1720		814		10797	11611		91	80	2	1	812	10796	0.195								0.0036			0.0079	0	0.35			0.78	0	1	1	2006	4560.4	1264.2	1495.3					88.5	82.5
1008	BL1	KRAS G12D	0.27	5.4	7.44	3	0.373599	13164	13167		0.71	0.06	2	1	798	12366	0.173								0.0036			0.008	0	0.36			0.8	0	1	1	2016	5270.8	993.08	994.05					0.46	0.14
1008		KRAS wt	74	1480		800		12367	13167		79	69	2	1	798	12366	0.173								0.0036			0.008	0	0.36			0.8	0	1	1	2006	4444	1263.3	1456.6					76.4	71.1
1008	BL1	KRAS G13D	0	0	7.44	0	0	10677	10677		0.33	0	0	0	685	9992	0																		1	1	997	0	493.45	493.45					0.15	0
1008		KRAS wt	78	1560		685		9992	10677		84	72	0	0	685	9992	0																		1	1	1993	3971.2	1229.7	1405.6					81	75
1008	BL1	KRAS Q61H					0
1008		KRAS wt
1009	AR1	NRAS G12C	13.1	262	49.2	140	2.31252	12483	12623		15.3	10.9	50	90	5864	6619	0								0.0176			0.0206	0.0147	1.73			2.02	1.45	1	1	1965	7072.3	1091.5	1157.9					14.2	12
1009		NRAS wt	744	14880		5914		6709	12623		763	724	50	90	5864	6619	0								0.0176			0.0206	0.0147	1.73			2.02	1.45	1	1	2539	5597.9	1234.3	3278.7					753	734
1009	AR1	NRAS G12D	1.4	28	49.2	16	0.290065	13760	13776		2.2	0.8	7	9	5493	8267	0.0871								0.0023			0.0034	0.0011	0.23			0.34	0.11	1	1	1965	7534.4	1060.6	1068.1					1.74	1.05
1009		NRAS wt	599	11980		5500		8276	13776		616	584	7	9	5493	8267	0.0871								0.0023			0.0034	0.0011	0.23			0.34	0.11	1	1	3017	5841.3	1261.6	3090					608	591
1009	AR1	KRAS 146T	1.1	22	49.2	11	0.270204	11863	11874		1.9	0.6	3	8	4057	7806	0								0.0022			0.0035	0.0009	0.22			0.35	0.09	1	1	1945	5506.2	951.47	955.69					1.45	0.79
1009		KRAS wt	492	9840		4060		7814	11874		508	477	3	8	4057	7806	0								0.0022			0.0035	0.0009	0.22			0.35	0.09	1	1	3000	4644.1	1249.5	2410.2					500	485
1009	AR1	KRAS G12S	1.1	22	49.2	12	0.254994	12674	12686		1.9	0.6	5	7	4689	7985	0.0825								0.002			0.0032	0.0009	0.2			0.32	0.09	1	1	1939	4957.8	809.18	813.11					1.47	0.82
1009		KRAS wt	544	10880		4694		7992	12686		559	528	5	7	4689	7985	0.0825								0.002			0.0032	0.0009	0.2			0.32	0.09	1	1	3005	5009.8	1369.9	2716.7					552	536
1009	AR1	KRAS Q61R	0.27	5.4	49.2	3	0.0525578	13181	13184		0.71	0.06	3	0	5702	7479	0.268								0.0004			0.00089	0	0.04			0.089	0	1	1	2009	2411.6	1180	1180.3					0.46	0.14
1009		KRAS wt	667	13340		5705		7479	13184		685	650	3	0	5702	7479	0.268								0.0004			0.00089	0	0.04			0.089	0	1	1	2478	5026.8	1540.7	3049.2					676	658
1009	AR2	NRAS G12C	39.6	792	36.8	427	6.56721	12481	12908		43.3	35.8	179	248	5896	6585	0								0.053			0.058	0.048	5.02			5.49	4.55	1	1	1965	6889.4	1064.4	1257.1					41.5	37.7
1009		NRAS wt	748	14960		6075		6833	12908		768	729	179	248	5896	6585	0								0.053			0.058	0.048	5.02			5.49	4.55	1	1	2539	5489.9	1203.1	3220.6					758	739
1009	AR2	NRAS G12D	1.1	22	36.8	10	0.207426	10560	10570		2	0.6	8	2	4803	5757	0.705								0.0016			0.0025	0.0006	0.16			0.25	0.06	1	1	1965	5652.8	1107.6	1111.9					1.51	0.8
1009		NRAS wt	714	14280		4811		5759	10570		735	694	8	2	4803	5757	0.705								0.0016			0.0025	0.0006	0.16			0.25	0.06	1	1	3017	5972.6	1298.8	3426.1					725	704
1009	AR2	KRAS 146T	0.39	7.8	36.8	4	0.103654	11954	11958		0.93	0.12	2	2	3853	8101	0.103								0.0009			0.0017	0	0.09			0.17	0	1	1	1945	6235.5	957.56	959.32					0.63	0.23
1009		KRAS wt	458	9160		3855		8103	11958		472	443	2	2	3853	8101	0.103								0.0009			0.0017	0	0.09			0.17	0	1	1	3000	4764.2	1246	2380.1					465	450
1009	AR2	KRAS Q61R	0.4	8	36.8	4	0.0717875	11662	11666		0.95	0.12	3	1	5565	6097	0.211								0.0005			0.0011	0	0.05			0.11	0	1	1	2009	2202.1	1268	1268.3					0.64	0.23
1009		KRAS wt	763	15260		5568		6098	11666		784	743	3	1	5565	6097	0.211								0.0005			0.0011	0	0.05			0.11	0	1	1	2478	5353.3	1604	3393.5					774	753
1009	AR2	KRAS G12S	0.35	7	36.8	3	0.0861079	10038	10041		0.93	0.08	2	1	3479	6559	0.172								0.0007			0.0015	0	0.07			0.15	0	1	1	1939	4901.6	797.3	798.53					0.6	0.18
1009		KRAS wt	501	10020		3481		6560	10041		518	484	2	1	3479	6559	0.172								0.0007			0.0015	0	0.07			0.15	0	1	1	3005	4930.6	1346.6	2589.1					509	492
1010	AR1	KRAS G12D	0.8	16	40.35	9	0.184087	13925	13934		1.4	0.4	3	6	4877	9048	0								0.0015			0.0025	0.0005	0.15			0.25	0.05	1	1	2016	5810.3	1045.2	1048.3					1.04	0.53
1010		KRAS wt	507	10140		4880		9054	13934		522	493	3	6	4877	9048	0								0.0015			0.0025	0.0005	0.15			0.25	0.05	1	1	2006	4491.3	1269.2	2397.7					515	500
1010	PD1	KRAS G12D	0.11	2.2	14.2	1	0.0818331	11147	11148		0.5	0	0	1	1221	9926	0								0.0008			0.0026	0	0.08			0.26	0	1	1	2016	5980.3	992.06	992.5					0.26	0.03
1010		KRAS wt	136	2720		1221		9927	11148		144	129	0	1	1221	9926	0								0.0008			0.0026	0	0.08			0.26	0	1	1	2006	4428.4	1247.4	1595.8					140.4	132.6
1011	BL2	KRAS G12S	0.09	1.8	5.78	1	0.293255	12725	12726		0.44	0	0	1	340	12385	0								0.0029			0.0098	0	0.29			0.97	0	1	1	1939	8755.3	807.03	807.66					0.23	0.03
1011		KRAS wt	31.9	638		340		12386	12726		35.3	28.5	0	1	340	12385	0								0.0029			0.0098	0	0.29			0.97	0	1	1	3005	5556.2	1349	1461.4					33.6	30.1
1011	BL2	KRAS Q61R	1.2	24	5.78	10	2.73973	9888	9898		2.1	0.6	10	0	345	9543	1.19								0.028			0.045	0.01	2.7			4.4	1	1	1	2009	2393.4	931.85	933.32					1.61	0.85
1011		KRAS wt	43	860		355		9543	9898		47.4	38.5	10	0	345	9543	1.19								0.028			0.045	0.01	2.7			4.4	1	1	1	2478	5410	1563.7	1701.7					45.3	40.7
1011	PD2	KRAS G12S	0.21	4.2	6.76	2	0.362319	11162	11164		0.68	0.03	0	2	550	10612	0								0.0035			0.009	0	0.35			0.89	0	1	1	1939	8483.8	790.55	791.93					0.41	0.09
1011		KRAS wt	59.4	1188		550		10614	11164		64.4	54.5	0	2	550	10612	0								0.0035			0.009	0	0.35			0.89	0	1	1	3005	5212.1	1323	1514.6					62	56.9
1011	PD2	KRAS Q61R	0.23	4.6	6.76	2	0.352734	10323	10325		0.73	0.03	2	0	563	9760	0.228								0.0034			0.0087	0	0.34			0.87	0	1	1	2009	2246.4	944.05	944.31					0.44	0.1
1011		KRAS wt	66	1320		565		9760	10325		72	61	2	0	563	9760	0.228								0.0034			0.0087	0	0.34			0.87	0	1	1	2478	5298.8	1560.8	1765.4					69	63.4
1012	AR1	KRAS G12S	1.6	32	35.3	16	0.401506	11986	12002		2.5	0.9	5	11	3964	8022	0								0.0033			0.005	0.0017	0.33			0.5	0.17	1	1	1965	7417.4	1088.9	1097.3					2	1.21
1012		KRAS wt	472	9440		3969		8033	12002		487	458	5	11	3964	8022	0								0.0033			0.005	0.0017	0.33			0.5	0.17	1	1	3017	6054.6	1294.9	2868.9					480	465
1012	AR1	NRAS G12D	1.1	22	35.3	13	0.34076	14064	14077		1.8	0.6	5	8	3797	10267	0.171								0.0029			0.0046	0.0013	0.29			0.45	0.13	1	1	1939	5536.7	791.54	795.92					1.42	0.81
1012		NRAS wt	370	7400		3802		10275	14077		382	359	5	8	3797	10267	0.171								0.0029			0.0046	0.0013	0.29			0.45	0.13	1	1	3005	5016.1	1338.9	2332.1					376	364
1012	AR2	KRAS G12S	1	20	37.9	10	0.112676	11975	11985		1.7	0.5	6	4	8859	3116	0								0.00062			0.00101	0.00023	0.062			0.101	0.023	1	1	1939	4805.9	808.51	811.85					1.33	0.7
1012		KRAS wt	1583	31660		8865		3120	11985		1619	1548	6	4	8859	3116	0								0.00062			0.00101	0.00023	0.062			0.101	0.023	1	1	3005	5100.1	1399.1	4136.6					1602	1565
1012	AR2	NRAS G12D	1.5	30	37.9	14	0.169718	11099	11113		2.4	0.8	12	2	8223	2876	0.665								0.00093			0.00143	0.00044	0.093			0.143	0.044	1	1	2016	3631.7	1150	1153.2					1.92	1.12
1012		NRAS wt	1589	31780		8235		2878	11113		1627	1553	12	2	8223	2876	0.665								0.00093			0.00143	0.00044	0.093			0.143	0.044	1	1	2006	4576.6	1322.7	3733.9					1608	1571
1012	BL2	KRAS G12S	0.2	4	6.04	2	0.382409	11945	11947		0.63	0.03	0	2	521	11424	0								0.0038			0.0095	0	0.37			0.94	0	1	1	1939	8527.3	802.83	804.12					0.38	0.09
1012		KRAS wt	52.5	1050		521		11426	11947		57	48	0	2	521	11424	0								0.0038			0.0095	0	0.37			0.94	0	1	1	3005	5570.7	1344.1	1528.4					54.8	50.2
1012	BL2	NRAS G12D	0	0	6.04	0	0	10514	10514		0.34	0	0	0	306	10208	0																		1	1	1965	0	970	970					0.15	0
1012		NRAS wt	34.7	694		306		10208	10514		38.6	30.9	0	0	306	10208	0																		1	1	3017	6029.1	1218.4	1358.4					36.7	32.8
1013	BL2	BRAF V600E	19.7	394	3.48	143	43.465	8470	8613		22.9	16.5	15	128	171	8299	1.69								0.77			0.93	0.6	43			49	38	1	1	2001	4139.1	1124.7	1174.8					21.3	18.1
1013		BRAF wt	25.7	514		186		8427	8613		29.4	22	15	128	171	8299	1.69								0.77			0.93	0.6	43			49	38	1	1	2638	4971.2	1936.2	2001.8					27.6	23.8
1014	AR1	KRAS G12D	1.1	22	30.2	12	0.258009	12802	12814		1.9	0.6	10	2	4629	8173	0.814								0.0021			0.0033	0.0009	0.21			0.33	0.09	1	1	2016	4425.1	1046.3	1049.5					1.45	0.81
1014		KRAS wt	529	10580		4639		8175	12814		544	514	10	2	4629	8173	0.814								0.0021			0.0033	0.0009	0.21			0.33	0.09	1	1	2006	4386	1260.9	2392.3					537	521
1014	AR1	KRAS G12S	1	20	30.2	11	0.246692	13409	13420		1.7	0.5	6	5	4442	8967	0.309								0.002			0.0033	0.0008	0.2			0.33	0.08	1	1	1939	5596.1	800.46	804.4					1.29	0.7
1014		KRAS wt	474	9480		4448		8972	13420		488	460	6	5	4442	8967	0.309								0.002			0.0033	0.0008	0.2			0.33	0.08	1	1	3005	5341.9	1339	2665.8					481	467
1014	BL1	KRAS G12D	0.51	10.2	11.8	5	0.170823	11499	11504		1.11	0.18	3	2	2919	8580	0.237								0.0015			0.0028	0.0001	0.15			0.28	0.01	1	1	2016	3944.4	1014.8	1016.1					0.78	0.31
1014		KRAS wt	345	6900		2922		8582	11504		357	332	3	2	2919	8580	0.237								0.0015			0.0028	0.0001	0.15			0.28	0.01	1	1	2006	4298.2	1253.1	2026.6					351	338
1014	BL1	KRAS G12S	0	0	11.8	0	0	5504	5504		0.64	0	0	0	1619	3885	0																		1	1	1939	0	745.43	745.43					0.29	0
1014		KRAS wt	410	8200		1619		3885	5504		430	390	0	0	1619	3885	0																		1	1	3005	4755.4	1261.7	2289.4					420	400
1014	PR2	KRAS G12S	0	0	7.34	0	0	12010	12010		0.29	0	0	0	840	11170	0																		1	1	1939	0	785.69	785.69					0.13	0
1014		KRAS wt	85	1700		840		11170	12010		91	80	0	0	840	11170	0																		1	1	3005	5380.5	1317.4	1601.5					88.3	82.4
1014	PR2	KRAS G12D	0.19	3.8	7.34	2	0.268097	12082	12084		0.62	0.03	0	2	744	11338	0								0.0026			0.0066	0	0.26			0.66	0	1	1	2016	4361.1	982.76	983.32					0.37	0.08
1014		KRAS wt	75	1500		744		11340	12084		80	69	0	2	744	11338	0								0.0026			0.0066	0	0.26			0.66	0	1	1	2006	4322.4	1251.3	1440.4					77.5	72
1014	PD1	KRAS G12S	0.2	4	11.3	2	0.0573066	11675	11677		0.65	0.03	0	2	3488	8187	0								0.0005			0.0012	0	0.05			0.12	0	1	1	1939	8200.9	782.45	783.72					0.39	0.09
1014		KRAS wt	417	8340		3488		8189	11677		431	404	0	2	3488	8187	0								0.0005			0.0012	0	0.05			0.12	0	1	1	3005	5325.8	1321.4	2517.6					425	410
1014	PD1	KRAS G12D	0	0	11.3	0	0	11600	11600		0.3	0	0	0	2138	9462	0																		1	1	2016	0	985.95	985.95					0.14	0
1014		KRAS wt	240	4800		2138		9462	11600		250	230	0	0	2138	9462	0																		1	1	2006	4252.7	1239.2	1794.6					245	234
1016	BL1	BRAF V600E	1.1	22	1.62	10	2.55754	10675	10685		1.9	0.5	2	8	379	10296	0.188								0.026			0.042	0.009	2.5			4.1	0.9	1	1	2001	4288.2	1134.6	1137.5					1.49	0.79
1016		BRAF wt	42.7	854		381		10304	10685		47	38.4	2	8	379	10296	0.188								0.026			0.042	0.009	2.5			4.1	0.9	1	1	2638	5063.3	1961.2	2071.8					44.9	40.5
1016	PD1	BRAF V600E	4.9	98	1.82	47	8.17391	11346	11393		6.4	3.6	2	45	526	10820	0								0.087			0.113	0.061	8			10.2	5.8	1	1	2001	4400.4	1149.8	1163.2					5.6	4.2
1016		BRAF wt	55.8	1116		528		10865	11393		60.6	51.1	2	45	526	10820	0								0.087			0.113	0.061	8			10.2	5.8	1	1	2638	5128.8	1980.1	2126					58.3	53.4
1017	BL2	KRAS G13D	0.28	5.6	7.26	3	0.312826	12769	12772		0.73	0.07	1	2	955	11814	0.0772								0.003			0.0067	0	0.3			0.66	0	1	1	997	1946.1	489.87	490.21					0.47	0.14
1017		KRAS wt	92	1840		956		11816	12772		97	86	1	2	955	11814	0.0772								0.003			0.0067	0	0.3			0.66	0	1	1	1993	3878.5	1213.7	1413.2					94.5	88.6
1017	BL2	KRAS G12D	0.21	4.2	7.26	2	0.21097	11136	11138		0.68	0.03	1	1	945	10191	0.0958								0.002			0.0051	0	0.2			0.51	0	1	1	2016	4272.3	1002.2	1002.8					0.41	0.09
1017		KRAS wt	104	2080		946		10192	11138		111	98	1	1	945	10191	0.0958								0.002			0.0051	0	0.2			0.51	0	1	1	2006	4439	1271	1540					107.8	101
1008	BL1	KRAS Q61H				0
1008		KRAS wt
1018	AR2	KRAS G12S	1	20	37.9	10	0.112676	11975	11985		1.7	0.5	6	4	8859	3116	0								0.00062			0.00101	0.00023	0.062			0.101	0.023	1	1	1939	4805.9	808.51	811.85					1.33	0.7
1018		KRAS wt	1583	31660		8865		3120	11985		1619	1548	6	4	8859	3116	0								0.00062			0.00101	0.00023	0.062			0.101	0.023	1	1	3005	5100.1	1399.1	4136.6					1602	1565
1018	AR2	KRAS G12D	1.5	30	37.9	14	0.169718	11099	11113		2.4	0.8	12	2	8223	2876	0.665								0.00093			0.00143	0.00044	0.093			0.143	0.044	1	1	2016	3631.7	1150	1153.2					1.92	1.12
1018		KRAS wt	1589	31780		8235		2878	11113		1627	1553	12	2	8223	2876	0.665								0.00093			0.00143	0.00044	0.093			0.143	0.044	1	1	2006	4576.6	1322.7	3733.9					1608	1571
1018	BL2	KRAS G12D	0	0	3.5	0	0	12045	12045		0.29	0	0	0	534	11511	0																		1	1	2016	0	1018.1	1018.1					0.13	0
1018		KRAS wt	53.3	1066		534		11511	12045		57.9	48.8	0	0	534	11511	0																		1	1	2006	4672	1300.5	1450					55.7	51
1018	BL2	KRAS G12S	0.21	4.2	3.52	2	0.4329	11156	11158		0.68	0.03	1	1	459	10697	0.101								0.004			0.011	0	0.4			1.1	0	1	1	1939	5731.3	809.49	810.38					0.41	0.09
1018		KRAS wt	49.5	990		460		10698	11158		54.1	45	1	1	459	10697	0.101								0.004			0.011	0	0.4			1.1	0	1	1	3005	5601	1357.8	1532.7					51.8	47.2
1019	AR1	KRAS G12S	0.37	7.4	28.4	4	0.112013	12574	12578		0.88	0.11	2	2	3565	9009	0.113								0.001			0.0019	0	0.1			0.19	0	1	1	1939	6146.5	818.67	820.36					0.6	0.21
1019		KRAS wt	392	7840		3567		9011	12578		405	379	2	2	3565	9009	0.113								0.001			0.0019	0	0.1			0.19	0	1	1	3005	5566.6	1369.7	2559.9					399	386
1019	AR1	NRAS G12D	0.49	9.8	28.4	4	0.25641	9696	9700		1.14	0.15	3	1	1553	8143	0.341								0.0024			0.0048	0	0.24			0.48	0	1	1	1965	6512.5	1012.4	1014.7					0.78	0.28
1019		NRAS wt	206	4120		1556		8144	9700		216	196	3	1	1553	8143	0.341								0.0024			0.0048	0	0.24			0.48	0	1	1	3017	6081.8	1238.9	2015.7					211	200
1019	BL1	NRAS G12D	0.13	2.6	15.4	1	0.163399	9030	9031		0.62	0.01	1	0	610	8420	0.13								0.0016			0.0053	0	0.16			0.53	0	1	1	1965	2892	977.63	977.84					0.32	0.04
1019		NRAS wt	82	1640		611		8420	9031		89	76	1	0	610	8420	0.13								0.0016			0.0053	0	0.16			0.53	0	1	1	3017	6089.1	1222.6	1551.9					85.8	79.1
1019	BL1	KRAS G12S	0.19	3.8	15.4	2	0.0960615	12592	12594		0.6	0.03	2	0	2078	10514	0.187								0.0009			0.0022	0	0.09			0.22	0	1	1	1939	4482.1	805.05	805.63					0.36	0.08
1019		KRAS wt	212	4240		2080		10514	12594		222	203	2	0	2078	10514	0.187								0.0009			0.0022	0	0.09			0.22	0	1	1	3005	5592.6	1349.9	2050.6					217	207.7
1020	AR1	KRAS Q61H	0	0	59	0	0	12179	12179		0.29	0	0	0	9461	2718	0																		1	1	2967	0	1673.3	1673.3					0.13	0
1020		KRAS wt	1764	35280		9461		2718	12179		1804	1726	0	0	9461	2718	0																		1	1	3534	5545.1	1645.2	4674.7					1785	1745
1020	BL3	KRAS Q61H	0.21	4.2	31.6	2	0.0809389	11154	11156		0.68	0.03	0	2	2469	8685	0								0.0007			0.0018	0	0.07			0.18	0	1	1	2967	5273.8	1427.4	1428.1					0.41	0.09
1020		KRAS wt	294	5880		2469		8687	11156		306	283	0	2	2469	8685	0								0.0007			0.0018	0	0.07			0.18	0	1	1	3534	5594.5	1594.2	2479.6					300	288
1020	PD1	KRAS Q61H	0	0	3.72	0	0	11548	11548		0.31	0	0	0	579	10969	0																		1	1	2967	0	1322.1	1322.1					0.14	0
1020		KRAS wt	60.5	1210		579		10969	11548		65.5	55.6	0	0	579	10969	0																		1	1	3534	5401	1557.5	1750.2					63	58
1021	AR1	PI3K E545K	176	3520	42.4	1789	34.0308	11072	12861		184	168	378	1411	3090	7982	0								0.477			0.504	0.449	32.3			33.5	31	1	1	2970	6777	2150.2	2793.8					180.4	172
1021		PI3K wt	370	7400		3468		9393	12861		382	357	378	1411	3090	7982	0								0.477			0.504	0.449	32.3			33.5	31	1	1	2009	4168.3	1495.3	2216.1					376	363
1021	BL1	PI3K E545K	1579	31580	31.8	7708	48.3745	2725	10433		1618	1542	6047	1661	2179	546	0								0.864			0.894	0.835	46.4			47.2	45.5	1	1	2970	6288.2	2320.7	5251.9					1599	1560
1021		PI3K wt	1827	36540		8226		2207	10433		1872	1785	6047	1661	2179	546	0								0.864			0.894	0.835	46.4			47.2	45.5	1	1	2009	4019.4	1575.5	3502.4					1850	1805
1021	PD1	PI3K E545K	34.9	698	5.54	334	37.6975	11103	11437		38.6	31.1	29	305	523	10580	1.43								0.6			0.68	0.52	37.5			40.7	34.3	1	1	2970	7969.2	2065.7	2238.1					36.8	33
1021		PI3K wt	58.2	1164		552		10885	11437		63.1	53.4	29	305	523	10580	1.43								0.6			0.68	0.52	37.5			40.7	34.3	1	1	2009	4614.3	1471.4	1623.1					60.7	55.7
AR= archival; BL= baseline; PR= partial response; PD= disease progression
[truncated: 9 more columns]

## Sheet: Table S7
Supplementary Table S7. Variant Allele Frequency (VAS) for RAS pathway genes tested by Ultra-deep Sequencing
sample_ID	mutation_ID	mutation_annotation	mutation_context	VAF	alternate counts	coverage	posterior_probability_deep_snv
1003_BL1	12:25398284_C/T	KRAS:p.G12D	A[C>T]C	5.18177e-05	7	135089	0.990046
1003_BL2	12:25398284_C/T	KRAS:p.G12D	A[C>T]C	1.61612e-05	2	123753	0.98993
1003_BL1	12:25398284_C/A	KRAS:p.G12V	A[C>A]C	0.00108077	146	135089	5.17219e-23
1003_BL2	12:25398284_C/A	KRAS:p.G12V	A[C>A]C	0.00013737	17	123753	0.881008
1003_BL1	12:25398282_C/A	KRAS:p.G13C	C[C>A]A	0.00195931	269	137293	2.42849e-46
1003_BL2	12:25398282_C/A	KRAS:p.G13C	C[C>A]A	1.59491e-05	2	125399	1
1003_BL1	12:25398281_C/T	KRAS:p.G13D	G[C>T]C	7.43374e-05	11	147974	0.990101
1003_BL2	12:25398281_C/T	KRAS:p.G13D	G[C>T]C	6.6454e-05	9	135432	0.990112
1003_BL1	12:25398262_C/A	KRAS:p.L19F	T[C>A]A	0.000786106	235	298942	4.38911e-11
1003_BL2	12:25398262_C/A	KRAS:p.L19F	T[C>A]A	0.000776143	211	271857	4.10995e-11
1003_BL1	12:25380277_G/T	KRAS:p.Q61K	T[C>A]A	0.00243294	2408	989751	2.80244e-97
1003_BL2	12:25380277_G/T	KRAS:p.Q61K	T[C>A]A	0.0021509	2128	989351	1.50139e-83
1003_BL1	12:25398279_C/T	KRAS:p.V14I	A[C>T]G	0.00131753	199	151040	1.13232e-07
1003_BL2	12:25398279_C/T	KRAS:p.V14I	A[C>T]G	0.00127826	177	138469	4.5661e-07
1003_BL1	1:115258748_C/A	NRAS:p.G12C	C[C>A]T	0.000409227	399	975009	3.69026e-07
1003_BL2	1:115258748_C/A	NRAS:p.G12C	C[C>A]T	3.72827e-05	25	670553	0.999041
1004_A1	5:112174241_G/T	APC:p.E984*	T[C>A]A	0.350083	347981	993997	6.73291e-05
1004_BL1	5:112174241_G/T	APC:p.E984*	T[C>A]A	0.381634	379790	995168	3.55673e-06
1004_A1	12:25398284_C/T	KRAS:p.G12D	A[C>T]C	4.97311e-05	7	140757	0.990121
1004_BL1	12:25398284_C/T	KRAS:p.G12D	A[C>T]C	4.25397e-05	7	164552	0.991251
1004_A1	12:25398285_C/T	KRAS:p.G12S	C[C>T]A	9.43978e-05	15	158902	0.999984
1004_BL1	12:25398285_C/T	KRAS:p.G12S	C[C>T]A	0.000366608	68	185484	0.00977211
1004_A1	12:25398281_C/T	KRAS:p.G13D	G[C>T]C	4.53239e-05	7	154444	0.99015
1004_BL1	12:25398281_C/T	KRAS:p.G13D	G[C>T]C	4.4286e-05	8	180644	0.992032
1004_A1	12:25398262_C/A	KRAS:p.L19F	T[C>A]A	0.000824101	257	311855	1.66185e-10
1004_BL1	12:25398262_C/A	KRAS:p.L19F	T[C>A]A	0.000855242	308	360132	8.999e-09
1004_A1	12:25380277_G/T	KRAS:p.Q61K	T[C>A]A	0.00302258	2986	987898	1.58737e-126
1004_BL1	12:25380277_G/T	KRAS:p.Q61K	T[C>A]A	0.00368358	3638	987626	5.6725e-160
1004_A1	12:25398260_G/A	KRAS:p.T20M	A[C>T]G	0.00426313	1327	311274	7.35602e-15
1004_BL1	12:25398260_G/A	KRAS:p.T20M	A[C>T]G	0.000175188	63	359613	0.989976
1004_A1	12:25398279_C/T	KRAS:p.V14I	A[C>T]G	0.00498058	786	157813	1.607e-81
1004_BL1	12:25398279_C/T	KRAS:p.V14I	A[C>T]G	0.0054638	1008	184487	1.18926e-90
1007_A1	12:25398284_C/T	KRAS:p.G12D	A[C>T]C	0.00017307	6	34668	0.96993
1007_BL1	12:25398284_C/T	KRAS:p.G12D	A[C>T]C	8.96413e-05	7	78089	0.989672
1007_BL2	12:25398284_C/T	KRAS:p.G12D	A[C>T]C	4.63368e-05	9	194230	0.990767
1007_R1	12:25398284_C/T	KRAS:p.G12D	A[C>T]C	2.28519e-05	1	43760	0.990198
1007_P1	12:25398284_C/T	KRAS:p.G12D	A[C>T]C	7.10454e-05	4	56302	0.990147
1007_A1	12:25398284_C/A	KRAS:p.G12V	A[C>A]C	0.000317295	11	34668	0.0975796
1007_BL1	12:25398284_C/A	KRAS:p.G12V	A[C>A]C	0.000243312	19	78089	0.133839
1007_BL2	12:25398284_C/A	KRAS:p.G12V	A[C>A]C	0.000185347	36	194230	0.424508
1007_R1	12:25398284_C/A	KRAS:p.G12V	A[C>A]C	9.14077e-05	4	43760	0.982581
1007_P1	12:25398284_C/A	KRAS:p.G12V	A[C>A]C	0.00111897	63	56302	1.82194e-19
1007_A1	12:25398262_C/A	KRAS:p.L19F	T[C>A]A	0.00185831	138	74261	4.29029e-49
1007_BL1	12:25398262_C/A	KRAS:p.L19F	T[C>A]A	0.000577836	99	171329	9.5102e-11
1007_BL2	12:25398262_C/A	KRAS:p.L19F	T[C>A]A	0.000733342	314	428177	8.38986e-06
1007_R1	12:25398262_C/A	KRAS:p.L19F	T[C>A]A	0.000844225	81	95946	9.68295e-16
1007_P1	12:25398262_C/A	KRAS:p.L19F	T[C>A]A	0.000827462	103	124477	2.41943e-16
1007_A1	12:25380275_T/A	KRAS:p.Q61H	C[T>A]T	8.01937e-05	25	311745	0.989672
1007_BL1	12:25380275_T/A	KRAS:p.Q61H	C[T>A]T	5.27063e-05	52	986599	0.993465
1007_BL2	12:25380275_T/A	KRAS:p.Q61H	C[T>A]T	5.94303e-05	59	992760	0.992225
1007_R1	12:25380275_T/A	KRAS:p.Q61H	C[T>A]T	6.86248e-05	68	990896	0.989643
1007_P1	12:25380275_T/A	KRAS:p.Q61H	C[T>A]T	6.56705e-05	65	989790	0.991174
1007_A1	12:25380277_G/T	KRAS:p.Q61K	T[C>A]A	0.000925198	287	310204	2.52621e-06
1007_BL1	12:25380277_G/T	KRAS:p.Q61K	T[C>A]A	0.00167821	1653	984977	9.05067e-61
1007_BL2	12:25380277_G/T	KRAS:p.Q61K	T[C>A]A	0.0031592	3126	989490	1.83344e-133
1007_R1	12:25380277_G/T	KRAS:p.Q61K	T[C>A]A	0.00115817	1145	988627	1
1007_P1	12:25380277_G/T	KRAS:p.Q61K	T[C>A]A	0.00297019	2931	986804	3.17115e-123
1007_A1	12:25398260_G/A	KRAS:p.T20M	A[C>T]G	0.000121264	9	74218	0.990476
1007_BL1	12:25398260_G/A	KRAS:p.T20M	A[C>T]G	0.00674817	1157	171454	2.55977e-28
1007_BL2	12:25398260_G/A	KRAS:p.T20M	A[C>T]G	0.0014793	632	427229	0.0184798
1007_R1	12:25398260_G/A	KRAS:p.T20M	A[C>T]G	0.00143677	138	96049	0.00800727
1007_P1	12:25398260_G/A	KRAS:p.T20M	A[C>T]G	0.000265156	33	124455	0.989821
1007_A1	12:25398279_C/T	KRAS:p.V14I	A[C>T]G	0.000542369	21	38719	1
1007_BL1	12:25398279_C/T	KRAS:p.V14I	A[C>T]G	0.00033059	29	87722	1
1007_BL2	12:25398279_C/T	KRAS:p.V14I	A[C>T]G	0.00162657	354	217636	2.67766e-11
1007_R1	12:25398279_C/T	KRAS:p.V14I	A[C>T]G	0.000572176	28	48936	0.999924
1007_P1	12:25398279_C/T	KRAS:p.V14I	A[C>T]G	0.00288454	182	63095	2.05725e-31
1008_BL1	12:25398284_C/T	KRAS:p.G12D	A[C>T]C	5.98402e-05	6	100267	0.99069
1008_BL1	12:25398262_C/A	KRAS:p.L19F	T[C>A]A	0.00134492	292	217114	6.73873e-44
1008_BL1	12:25380275_T/A	KRAS:p.Q61H	C[T>A]T	5.36227e-05	53	988387	0.993293
1008_BL1	12:25380277_G/T	KRAS:p.Q61K	T[C>A]A	0.00226077	2226	984622	1.21216e-88
1008_BL1	1:115258747_C/T	NRAS:p.G12D	A[C>T]C	0.000324825	314	966675	0.000226572
1009_A1	12:25398285_C/A	KRAS:p.G12C	C[C>A]A	0.00573474	684	119273	4.55744e-142
1009_A2	12:25398285_C/A	KRAS:p.G12C	C[C>A]A	8.21372e-05	4	48699	0.999804
1009_A3	12:25398285_C/A	KRAS:p.G12C	C[C>A]A	4.70735e-05	18	382381	1
1009_A4	12:25398285_C/A	KRAS:p.G12C	C[C>A]A	0.000151139	12	79397	0.997532
1009_A5	12:25398285_C/A	KRAS:p.G12C	C[C>A]A	6.18896e-05	5	80789	0.999993
1009_A1	12:25398285_C/T	KRAS:p.G12S	C[C>T]A	0.000117378	14	119273	0.999874
1009_A2	12:25398285_C/T	KRAS:p.G12S	C[C>T]A	0.000102672	5	48699	0.999504
1009_A3	12:25398285_C/T	KRAS:p.G12S	C[C>T]A	2.61519e-05	10	382381	1
1009_A4	12:25398285_C/T	KRAS:p.G12S	C[C>T]A	8.81645e-05	7	79397	0.999944
1009_A5	12:25398285_C/T	KRAS:p.G12S	C[C>T]A	8.66455e-05	7	80789	0.999957
1009_A1	12:25380276_T/C	KRAS:p.Q61R	T[T>C]G	0.000101981	28	274561	0.992698
1009_A2	12:25380276_T/C	KRAS:p.Q61R	T[T>C]G	7.69381e-05	35	454911	0.992747
1009_A3	12:25380276_T/C	KRAS:p.Q61R	T[T>C]G	0.000163417	118	722079	0.989915
1009_A4	12:25380276_T/C	KRAS:p.Q61R	T[T>C]G	0.0001409	82	581974	0.990036
1009_A5	12:25380276_T/C	KRAS:p.Q61R	T[T>C]G	0.000150409	54	359021	0.989335
1009_A1	12:25398260_G/A	KRAS:p.T20M	A[C>T]G	0.00856478	2010	234682	2.83999e-36
1009_A2	12:25398260_G/A	KRAS:p.T20M	A[C>T]G	0.000136196	13	95451	0.990141
1009_A3	12:25398260_G/A	KRAS:p.T20M	A[C>T]G	0.000160425	120	748015	0.989568
1009_A4	12:25398260_G/A	KRAS:p.T20M	A[C>T]G	0.000224402	35	155970	0.98994
1009_A5	12:25398260_G/A	KRAS:p.T20M	A[C>T]G	0.000296279	47	158634	0.989934
1009_A1	12:25398279_C/T	KRAS:p.V14I	A[C>T]G	0.000251551	30	119260	1
1009_A2	12:25398279_C/T	KRAS:p.V14I	A[C>T]G	0.000287504	14	48695	1
1009_A3	12:25398279_C/T	KRAS:p.V14I	A[C>T]G	0.000394935	150	379809	1
1009_A4	12:25398279_C/T	KRAS:p.V14I	A[C>T]G	0.00521831	414	79336	9.888e-82
1009_A5	12:25398279_C/T	KRAS:p.V14I	A[C>T]G	0.000383925	31	80745	1
1009_A1	1:115258748_C/A	NRAS:p.G12C	C[C>A]T	0.0131797	12757	967929	0
1009_A2	1:115258748_C/A	NRAS:p.G12C	C[C>A]T	0.0858188	82898	965966	0
1009_A3	1:115258748_C/A	NRAS:p.G12C	C[C>A]T	0.108141	104931	970315	0
1009_A4	1:115258748_C/A	NRAS:p.G12C	C[C>A]T	0.0321763	31209	969938	0
1009_A5	1:115258748_C/A	NRAS:p.G12C	C[C>A]T	0.0539173	52025	964904	0
1009_A1	1:115258747_C/T	NRAS:p.G12D	A[C>T]C	3.29504e-05	32	971156	0.992872
1009_A2	1:115258747_C/T	NRAS:p.G12D	A[C>T]C	4.55548e-05	44	965869	0.994353
1009_A3	1:115258747_C/T	NRAS:p.G12D	A[C>T]C	3.49034e-05	34	974116	0.98987
1009_A4	1:115258747_C/T	NRAS:p.G12D	A[C>T]C	3.39422e-05	33	972241	0.99003
1009_A5	1:115258747_C/T	NRAS:p.G12D	A[C>T]C	3.41231e-05	33	967087	0.989951
1010_A1	12:25398285_C/A	KRAS:p.G12C	C[C>A]A	6.90846e-05	6	86850	0.999958
1010_A2	12:25398285_C/A	KRAS:p.G12C	C[C>A]A	0.000414664	34	81994	0.0102159
1010_P1	12:25398285_C/A	KRAS:p.G12C	C[C>A]A	8.05924e-05	9	111673	0.999796
1010_P2	12:25398285_C/A	KRAS:p.G12C	C[C>A]A	0.000705414	270	382754	4.59975e-11
1010_A1	12:25398284_C/T	KRAS:p.G12D	A[C>T]C	2.59538e-05	2	77060	0.990272
1010_A2	12:25398284_C/T	KRAS:p.G12D	A[C>T]C	6.87985e-05	5	72676	0.99054
1010_P1	12:25398284_C/T	KRAS:p.G12D	A[C>T]C	7.07256e-05	7	98974	0.999887
1010_P2	12:25398284_C/T	KRAS:p.G12D	A[C>T]C	4.72755e-05	16	338442	0.991777
1010_A1	12:25398262_C/A	KRAS:p.L19F	T[C>A]A	0.000979822	165	168398	2.38447e-21
1010_A2	12:25398262_C/A	KRAS:p.L19F	T[C>A]A	0.000826916	131	158420	1.67163e-14
1010_P1	12:25398262_C/A	KRAS:p.L19F	T[C>A]A	0.000770011	167	216880	5.49838e-13
1010_P2	12:25398262_C/A	KRAS:p.L19F	T[C>A]A	0.00169457	1262	744731	9.56657e-68
1010_A1	12:25380277_G/T	KRAS:p.Q61K	T[C>A]A	0.00214582	2121	988434	2.93195e-83
1010_A2	12:25380277_G/T	KRAS:p.Q61K	T[C>A]A	0.00232179	2292	987171	9.57562e-92
1010_P1	12:25380277_G/T	KRAS:p.Q61K	T[C>A]A	0.00283061	2796	987774	7.16534e-117
1010_P2	12:25380277_G/T	KRAS:p.Q61K	T[C>A]A	0.00244014	2413	988878	2.52543e-97
1010_A1	12:25398260_G/A	KRAS:p.T20M	A[C>T]G	0.000769914	130	168850	0.823104
1010_A2	12:25398260_G/A	KRAS:p.T20M	A[C>T]G	0.00316583	503	158884	7.98339e-11
1010_P1	12:25398260_G/A	KRAS:p.T20M	A[C>T]G	0.000138422	30	216728	0.990259
1010_P2	12:25398260_G/A	KRAS:p.T20M	A[C>T]G	0.000167977	125	744150	0.989588
1010_A1	12:25398279_C/T	KRAS:p.V14I	A[C>T]G	0.0010321	89	86232	0.00330187
1010_A2	12:25398279_C/T	KRAS:p.V14I	A[C>T]G	0.0014268	116	81301	3.29532e-06
1010_P1	12:25398279_C/T	KRAS:p.V14I	A[C>T]G	0.000279627	31	110862	1
1010_P2	12:25398279_C/T	KRAS:p.V14I	A[C>T]G	0.000255044	97	380326	0.999998
1010_A1	1:115258748_C/A	NRAS:p.G12C	C[C>A]T	3.81795e-05	26	680994	0.998717
1010_A2	1:115258748_C/A	NRAS:p.G12C	C[C>A]T	0.000203988	78	382376	0.830786
1010_P1	1:115258748_C/A	NRAS:p.G12C	C[C>A]T	8.90865e-05	23	258176	0.99227
1010_P2	1:115258748_C/A	NRAS:p.G12C	C[C>A]T	0.000315964	50	158246	0.0220815
1011_BL1	5:112175925_C/A	APC:p.S1545*	T[C>A]A	0.327301	321884	983450	0.000547714
1011_P1	5:112175925_C/A	APC:p.S1545*	T[C>A]A	0.358925	354925	988856	1.99589e-05
1011_P2	5:112175925_C/A	APC:p.S1545*	T[C>A]A	0.544199	539390	991164	4.64392e-12
1011_BL1	12:25398284_C/T	KRAS:p.G12D	A[C>T]C	0.00509714	701	137528	9.40689e-133
1011_P1	12:25398284_C/T	KRAS:p.G12D	A[C>T]C	4.57967e-05	8	174685	0.990116
1011_P2	12:25398284_C/T	KRAS:p.G12D	A[C>T]C	4.34292e-05	2	46052	0.999869
1011_BL1	12:25398285_C/T	KRAS:p.G12S	C[C>T]A	6.49857e-05	10	153880	0.999992
1011_P1	12:25398285_C/T	KRAS:p.G12S	C[C>T]A	5.10874e-05	10	195743	1
1011_P2	12:25398285_C/T	KRAS:p.G12S	C[C>T]A	0	0	51399	0.999973
1011_BL1	12:25398281_C/T	KRAS:p.G13D	G[C>T]C	7.32454e-05	11	150180	0.990704
1011_P1	12:25398281_C/T	KRAS:p.G13D	G[C>T]C	0.0130431	2485	190522	0
1011_P2	12:25398281_C/T	KRAS:p.G13D	G[C>T]C	7.9877e-05	4	50077	0.991061
1011_BL1	12:25398262_C/A	KRAS:p.L19F	T[C>A]A	0.225794	68086	301541	0
1011_P1	12:25398262_C/A	KRAS:p.L19F	T[C>A]A	0.262691	100773	383618	0
1011_P2	12:25398262_C/A	KRAS:p.L19F	T[C>A]A	0.40851	40485	99104	0
1011_BL1	12:25380277_G/T	KRAS:p.Q61K	T[C>A]A	1.71112e-05	17	993503	1
1011_P1	12:25380277_G/T	KRAS:p.Q61K	T[C>A]A	0.00257172	2546	989998	3.77551e-104
1011_P2	12:25380277_G/T	KRAS:p.Q61K	T[C>A]A	0.00132807	1315	990160	1
1011_BL1	12:25398260_G/A	KRAS:p.T20M	A[C>T]G	0.000132886	40	301010	0.990098
1011_P1	12:25398260_G/A	KRAS:p.T20M	A[C>T]G	0.000424923	163	383599	0.983429
1011_P2	12:25398260_G/A	KRAS:p.T20M	A[C>T]G	0.00158991	157	98748	0.00165273
1011_BL1	12:25398279_C/T	KRAS:p.V14I	A[C>T]G	0.00126927	194	152844	2.63598e-06
1011_P1	12:25398279_C/T	KRAS:p.V14I	A[C>T]G	0.001742	339	194604	3.34616e-14
1011_P2	12:25398279_C/T	KRAS:p.V14I	A[C>T]G	0.00178138	91	51084	2.35773e-11
1011_BL1	3:178936091_G/A	PIK3CA:p.E545K	T[C>T]A	8.31985e-05	51	612992	0.996275
1011_P1	3:178936091_G/A	PIK3CA:p.E545K	T[C>T]A	0.0101239	2508	247730	0
1011_P2	3:178936091_G/A	PIK3CA:p.E545K	T[C>T]A	7.25706e-05	72	992137	0.999901
1012_BL1	12:25398285_C/A	KRAS:p.G12C	C[C>A]A	6.12174e-05	9	147017	0.999989
1012_BL2	12:25398285_C/A	KRAS:p.G12C	C[C>A]A	8.42058e-05	6	71254	0.999823
1012_BL3	12:25398285_C/A	KRAS:p.G12C	C[C>A]A	0.000366745	58	158148	0.00851075
1012_BL1	12:25398285_C/T	KRAS:p.G12S	C[C>T]A	8.16232e-05	12	147017	0.999932
1012_BL2	12:25398285_C/T	KRAS:p.G12S	C[C>T]A	7.01715e-05	5	71254	0.99992
1012_BL3	12:25398285_C/T	KRAS:p.G12S	C[C>T]A	6.32319e-05	10	158148	1
1012_BL1	12:25398282_C/A	KRAS:p.G13C	C[C>A]A	0.00156662	209	133408	2.04364e-35
1012_BL2	12:25398282_C/A	KRAS:p.G13C	C[C>A]A	1.55003e-05	1	64515	1
1012_BL3	12:25398282_C/A	KRAS:p.G13C	C[C>A]A	2.76809e-05	4	144504	1
1012_BL1	12:25398262_C/A	KRAS:p.L19F	T[C>A]A	0.000848973	244	287406	1.23692e-12
1012_BL2	12:25398262_C/A	KRAS:p.L19F	T[C>A]A	0.00101488	141	138933	1.26567e-20
1012_BL3	12:25398262_C/A	KRAS:p.L19F	T[C>A]A	0.000872167	272	311867	2.54964e-12
1012_BL1	12:25380277_G/T	KRAS:p.Q61K	T[C>A]A	0.00343694	3396	988087	1.90865e-147
1012_BL2	12:25380277_G/T	KRAS:p.Q61K	T[C>A]A	0.00255052	2521	988425	5.11586e-103
1012_BL3	12:25380277_G/T	KRAS:p.Q61K	T[C>A]A	0.00232908	2310	991806	2.83271e-92
1012_BL1	12:25398279_C/T	KRAS:p.V14I	A[C>T]G	0.00254589	372	146118	9.86227e-30
1012_BL2	12:25398279_C/T	KRAS:p.V14I	A[C>T]G	0.000395458	28	70804	1
1012_BL3	12:25398279_C/T	KRAS:p.V14I	A[C>T]G	0.00427902	673	157279	2.44838e-65
1012_BL1	1:115258747_C/T	NRAS:p.G12D	A[C>T]C	5.49728e-05	41	745824	0.995495
1012_BL2	1:115258747_C/T	NRAS:p.G12D	A[C>T]C	2.21012e-05	8	361972	0.996337
1012_BL3	1:115258747_C/T	NRAS:p.G12D	A[C>T]C	7.63207e-05	50	655130	0.992777
1013_BL1	7:140453136_A/T	BRAF:p.V600E	G[T>A]G	0.430547	102627	238364	0
1013_BL2	7:140453136_A/T	BRAF:p.V600E	G[T>A]G	0.376188	23719	63051	0
1013_BL1	12:25398262_C/A	KRAS:p.L19F	T[C>A]A	0.000699434	121	172997	2.13314e-13
1013_BL2	12:25398262_C/A	KRAS:p.L19F	T[C>A]A	0.000688617	113	164097	4.54897e-13
1013_BL1	12:25380277_G/T	KRAS:p.Q61K	T[C>A]A	0.00305178	3008	985653	8.10838e-128
1013_BL2	12:25380277_G/T	KRAS:p.Q61K	T[C>A]A	0.000885308	608	686767	0.995821
1013_BL1	12:25398279_C/T	KRAS:p.V14I	A[C>T]G	0.00502659	448	89126	3.20295e-80
1013_BL2	12:25398279_C/T	KRAS:p.V14I	A[C>T]G	0.00125016	106	84789	3.85638e-05
1014_A1	5:112175162_C/T	APC:p.Q1291*	T[C>T]A	0.397083	392838	989309	1.6574e-06
1014_A2	5:112175162_C/T	APC:p.Q1291*	T[C>T]A	0.429984	425102	988645	5.17076e-08
1014_BL1	5:112175162_C/T	APC:p.Q1291*	T[C>T]A	0.482779	477694	989468	1.6699e-08
1014_BL2	5:112175162_C/T	APC:p.Q1291*	T[C>T]A	0.383401	379092	988760	1.45121e-06
1014_R1	5:112175162_C/T	APC:p.Q1291*	T[C>T]A	NA	0	0	NA
1014_R2	5:112175162_C/T	APC:p.Q1291*	T[C>T]A	0.282091	278094	985831	0.000158741
1014_P1	5:112175162_C/T	APC:p.Q1291*	T[C>T]A	0.396726	348584	878652	0.00162635
1014_A1	12:25398262_C/A	KRAS:p.L19F	T[C>A]A	0.000864087	237	274278	1.86132e-12
1014_A2	12:25398262_C/A	KRAS:p.L19F	T[C>A]A	0.000873175	65	74441	1.16494e-16
1014_BL1	12:25398262_C/A	KRAS:p.L19F	T[C>A]A	0.00080958	178	219867	4.9656e-15
1014_BL2	12:25398262_C/A	KRAS:p.L19F	T[C>A]A	0.00115001	139	120869	7.99187e-30
1014_R1	12:25398262_C/A	KRAS:p.L19F	T[C>A]A	0.000839703	97	115517	5.48605e-16
1014_R2	12:25398262_C/A	KRAS:p.L19F	T[C>A]A	0.00066282	68	102592	2.86797e-12
1014_P1	12:25398262_C/A	KRAS:p.L19F	T[C>A]A	0.000144492	16	110733	0.995269
1014_A1	12:25380277_G/T	KRAS:p.Q61K	T[C>A]A	0.00116565	1155	990866	1
1014_A2	12:25380277_G/T	KRAS:p.Q61K	T[C>A]A	0.00131678	1302	988779	0.999997
1014_BL1	12:25380277_G/T	KRAS:p.Q61K	T[C>A]A	0.00141661	1400	988275	5.28255e-05
1014_BL2	12:25380277_G/T	KRAS:p.Q61K	T[C>A]A	0.00144579	1429	988386	0.705208
1014_R1	12:25380277_G/T	KRAS:p.Q61K	T[C>A]A	0.00133212	1314	986394	0.954713
1014_R2	12:25380277_G/T	KRAS:p.Q61K	T[C>A]A	0.000874891	92	105156	1.85191e-14
1014_P1	12:25380277_G/T	KRAS:p.Q61K	T[C>A]A	0.000100323	19	189389	0.999523
1014_A1	12:25380276_T/C	KRAS:p.Q61R	T[T>C]G	0.000119845	119	992949	0.990015
1014_A2	12:25380276_T/C	KRAS:p.Q61R	T[T>C]G	0.000110935	110	991574	0.990835
1014_BL1	12:25380276_T/C	KRAS:p.Q61R	T[T>C]G	0.000108029	107	990479	0.990031
1014_BL2	12:25380276_T/C	KRAS:p.Q61R	T[T>C]G	0.000112028	111	990824	0.989624
1014_R1	12:25380276_T/C	KRAS:p.Q61R	T[T>C]G	0.000503765	498	988557	0.0207818
1014_R2	12:25380276_T/C	KRAS:p.Q61R	T[T>C]G	0.000208117	22	105710	0.978561
1014_P1	12:25380276_T/C	KRAS:p.Q61R	T[T>C]G	0.000136513	26	190458	0.990781
1014_A1	12:25398260_G/A	KRAS:p.T20M	A[C>T]G	0.000719259	197	273893	0.886527
1014_A2	12:25398260_G/A	KRAS:p.T20M	A[C>T]G	0.000777563	58	74592	0.820131
1014_BL1	12:25398260_G/A	KRAS:p.T20M	A[C>T]G	0.000741982	163	219682	0.860017
1014_BL2	12:25398260_G/A	KRAS:p.T20M	A[C>T]G	0.00110311	133	120568	0.17936
1014_R1	12:25398260_G/A	KRAS:p.T20M	A[C>T]G	0.00128454	149	115995	0.0357187
1014_R2	12:25398260_G/A	KRAS:p.T20M	A[C>T]G	0.000175454	18	102591	0.990375
1014_P1	12:25398260_G/A	KRAS:p.T20M	A[C>T]G	0.000991991	109	109880	0.385899
1014_A1	12:25398279_C/T	KRAS:p.V14I	A[C>T]G	0.000671189	93	138560	0.999981
1014_A2	12:25398279_C/T	KRAS:p.V14I	A[C>T]G	0.0022659	86	37954	8.07991e-16
1014_BL1	12:25398279_C/T	KRAS:p.V14I	A[C>T]G	0.00179627	200	111342	2.24488e-15
1014_BL2	12:25398279_C/T	KRAS:p.V14I	A[C>T]G	0.000228893	14	61164	1
1014_R1	12:25398279_C/T	KRAS:p.V14I	A[C>T]G	0.00177223	104	58683	3.56385e-12
1014_R2	12:25398279_C/T	KRAS:p.V14I	A[C>T]G	0.000591908	31	52373	0.999876
1014_P1	12:25398279_C/T	KRAS:p.V14I	A[C>T]G	0.000411501	23	55893	1
1014_A1	1:115258748_C/A	NRAS:p.G12C	C[C>A]T	7.48301e-05	53	708271	0.997081
1014_A2	1:115258748_C/A	NRAS:p.G12C	C[C>A]T	6.51039e-05	19	291841	0.995288
1014_BL1	1:115258748_C/A	NRAS:p.G12C	C[C>A]T	8.64063e-05	40	462929	0.993392
1014_BL2	1:115258748_C/A	NRAS:p.G12C	C[C>A]T	6.33421e-05	25	394682	0.997572
1014_R1	1:115258748_C/A	NRAS:p.G12C	C[C>A]T	0.000145219	41	282332	0.985162
1014_R2	1:115258748_C/A	NRAS:p.G12C	C[C>A]T	8.69771e-05	18	206951	0.994794
1014_P1	1:115258748_C/A	NRAS:p.G12C	C[C>A]T	0.00112709	247	219148	1.70125e-37
1016_BL1	7:140453136_A/T	BRAF:p.V600E	G[T>A]G	NA	129	4969	NA
1016_BL2	7:140453136_A/T	BRAF:p.V600E	G[T>A]G	0.086699	38541	444538	4.66756e-74
1016_P1	7:140453136_A/T	BRAF:p.V600E	G[T>A]G	0.057715	7522	130330	7.90909e-44
1016_P2	7:140453136_A/T	BRAF:p.V600E	G[T>A]G	NA	232	1164	NA
1016_BL1	12:25398262_C/A	KRAS:p.L19F	T[C>A]A	0.000788897	348	441122	8.15418e-07
1016_BL2	12:25398262_C/A	KRAS:p.L19F	T[C>A]A	0.000860353	169	196431	1.19685e-14
1016_P1	12:25398262_C/A	KRAS:p.L19F	T[C>A]A	0.000839313	275	327649	2.38815e-11
1016_P2	12:25398262_C/A	KRAS:p.L19F	T[C>A]A	2.68537e-05	26	968209	0.988853
1016_BL1	12:25380277_G/T	KRAS:p.Q61K	T[C>A]A	2.61261e-05	26	995172	1
1016_BL2	12:25380277_G/T	KRAS:p.Q61K	T[C>A]A	3.82377e-05	38	993783	0.999997
1016_P1	12:25380277_G/T	KRAS:p.Q61K	T[C>A]A	0.000338245	336	993364	1.41213e-05
1016_P2	12:25380277_G/T	KRAS:p.Q61K	T[C>A]A	2.1115e-05	21	994553	1
1016_BL1	12:25398279_C/T	KRAS:p.V14I	A[C>T]G	0.00075197	169	224743	0.996209
1016_BL2	12:25398279_C/T	KRAS:p.V14I	A[C>T]G	0.00647329	657	101494	7.78237e-115
1016_P1	12:25398279_C/T	KRAS:p.V14I	A[C>T]G	0.000516256	86	166584	1
1016_P2	12:25398279_C/T	KRAS:p.V14I	A[C>T]G	NA	9	17764	NA
1017_BL1	5:112173704_C/T	APC:p.R805*	T[C>T]G	0.0258107	25609	992187	2.11905e-63
1017_BL1	12:25398284_C/T	KRAS:p.G12D	A[C>T]C	3.66947e-05	9	245267	0.990242
1017_BL1	12:25398281_C/T	KRAS:p.G13D	G[C>T]C	2.22828e-05	6	269266	0.990205
1017_BL1	12:25398262_C/A	KRAS:p.L19F	T[C>A]A	0.000752623	405	538118	9.70549e-06
1017_BL1	12:25380275_T/A	KRAS:p.Q61H	C[T>A]T	5.44873e-05	54	991057	0.993122
1017_BL1	12:25380277_G/T	KRAS:p.Q61K	T[C>A]A	0.00259537	2563	987529	4.39843e-105
1017_BL1	12:25398279_C/T	KRAS:p.V14I	A[C>T]G	0.00114818	316	275218	0.000262407
1018_A1	12:25398284_C/T	KRAS:p.G12D	A[C>T]C	0.00106174	53	49918	9.92095e-15
1018_A2	12:25398284_C/T	KRAS:p.G12D	A[C>T]C	3.28944e-05	6	182402	0.989884
1018_A3	12:25398284_C/T	KRAS:p.G12D	A[C>T]C	3.98647e-05	12	301018	0.990015
1018_A4	12:25398284_C/T	KRAS:p.G12D	A[C>T]C	6.24664e-05	5	80043	0.990135
1018_BL1	12:25398284_C/T	KRAS:p.G12D	A[C>T]C	6.45508e-05	3	46475	0.990198
1018_A1	12:25398281_C/T	KRAS:p.G13D	G[C>T]C	3.6519e-05	2	54766	0.989956
1018_A2	12:25398281_C/T	KRAS:p.G13D	G[C>T]C	9.98776e-05	20	200245	0.990106
1018_A3	12:25398281_C/T	KRAS:p.G13D	G[C>T]C	3.92638e-05	13	331094	0.989899
1018_A4	12:25398281_C/T	KRAS:p.G13D	G[C>T]C	0.000170606	15	87922	0.985195
1018_BL1	12:25398281_C/T	KRAS:p.G13D	G[C>T]C	9.82975e-05	5	50866	0.990341
1018_A1	12:25398262_C/A	KRAS:p.L19F	T[C>A]A	0.000832316	92	110535	1.65637e-15
1018_A2	12:25398262_C/A	KRAS:p.L19F	T[C>A]A	0.000740933	300	404895	3.3832e-05
1018_A3	12:25398262_C/A	KRAS:p.L19F	T[C>A]A	0.000737693	493	668300	0.99632
1018_A4	12:25398262_C/A	KRAS:p.L19F	T[C>A]A	0.000772841	137	177268	4.38796e-13
1018_BL1	12:25398262_C/A	KRAS:p.L19F	T[C>A]A	0.000939463	96	102186	1.00387e-18
1018_A1	12:25380277_G/T	KRAS:p.Q61K	T[C>A]A	0.00116623	1153	988654	1
1018_A2	12:25380277_G/T	KRAS:p.Q61K	T[C>A]A	0.00119048	41	34440	6.04684e-17
1018_A3	12:25380277_G/T	KRAS:p.Q61K	T[C>A]A	0.000924332	673	728093	0.999942
1018_A4	12:25380277_G/T	KRAS:p.Q61K	T[C>A]A	0.000861858	247	286590	1.33502e-05
1018_BL1	12:25380277_G/T	KRAS:p.Q61K	T[C>A]A	0.00220185	2179	989623	5.06402e-86
1018_A1	12:25398260_G/A	KRAS:p.T20M	A[C>T]G	0.000552056	61	110496	0.962333
1018_A2	12:25398260_G/A	KRAS:p.T20M	A[C>T]G	0.000717067	290	404425	0.901983
1018_A3	12:25398260_G/A	KRAS:p.T20M	A[C>T]G	0.0015718	1048	666750	0.0253598
1018_A4	12:25398260_G/A	KRAS:p.T20M	A[C>T]G	0.00186344	331	177628	0.000116608
1018_BL1	12:25398260_G/A	KRAS:p.T20M	A[C>T]G	0.00208678	213	102071	8.39244e-06
1018_A1	12:25398279_C/T	KRAS:p.V14I	A[C>T]G	0.00110964	62	55874	0.00426224
1018_A2	12:25398279_C/T	KRAS:p.V14I	A[C>T]G	0.0014855	304	204645	4.60539e-09
1018_A3	12:25398279_C/T	KRAS:p.V14I	A[C>T]G	0.00156132	527	337535	2.55157e-08
1018_A4	12:25398279_C/T	KRAS:p.V14I	A[C>T]G	0.000889759	80	89912	0.992519
1018_BL1	12:25398279_C/T	KRAS:p.V14I	A[C>T]G	0.00263639	137	51965	7.8592e-25
1019_A1	12:25398285_C/T	KRAS:p.G12S	C[C>T]A	6.39829e-05	6	93775	0.999516
1019_A2	12:25398285_C/T	KRAS:p.G12S	C[C>T]A	3.84672e-05	6	155977	1
1019_A3	12:25398285_C/T	KRAS:p.G12S	C[C>T]A	2.92543e-05	1	34183	0.999674
1019_BL1	12:25398285_C/T	KRAS:p.G12S	C[C>T]A	8.20595e-05	7	85304	0.999909
1019_BL2	12:25398285_C/T	KRAS:p.G12S	C[C>T]A	8.7162e-05	9	103256	0.99995
1019_A1	12:25398284_C/A	KRAS:p.G12V	A[C>A]C	0.000288039	24	83322	0.0192725
1019_A2	12:25398284_C/A	KRAS:p.G12V	A[C>A]C	6.4262e-05	10	155613	0.987413
1019_A3	12:25398284_C/A	KRAS:p.G12V	A[C>A]C	0.000164344	5	30424	0.934327
1019_BL1	12:25398284_C/A	KRAS:p.G12V	A[C>A]C	0.000211548	16	75633	0.384152
1019_BL2	12:25398284_C/A	KRAS:p.G12V	A[C>A]C	0.00022888	21	91751	0.165375
1019_A1	12:25398262_C/A	KRAS:p.L19F	T[C>A]A	0.000871409	157	180168	2.12301e-15
1019_A2	12:25398262_C/A	KRAS:p.L19F	T[C>A]A	0.000161965	50	308708	0.999999
1019_A3	12:25398262_C/A	KRAS:p.L19F	T[C>A]A	0.00148716	97	65225	6.17843e-35
1019_BL1	12:25398262_C/A	KRAS:p.L19F	T[C>A]A	0.000840679	140	166532	4.10243e-16
1019_BL2	12:25398262_C/A	KRAS:p.L19F	T[C>A]A	0.000746213	150	201015	4.05487e-13
1019_A1	12:25380277_G/T	KRAS:p.Q61K	T[C>A]A	0.00180677	1785	987952	5.6805e-63
1019_A2	12:25380277_G/T	KRAS:p.Q61K	T[C>A]A	6.57683e-05	9	136844	0.999921
1019_A3	12:25380277_G/T	KRAS:p.Q61K	T[C>A]A	4.53185e-05	45	992973	0.999983
1019_BL1	12:25380277_G/T	KRAS:p.Q61K	T[C>A]A	0.0038324	3783	987110	1.06464e-167
1019_BL2	12:25380277_G/T	KRAS:p.Q61K	T[C>A]A	0.00149844	1482	989031	3.81018e-12
1019_A1	12:25398279_C/T	KRAS:p.V14I	A[C>T]G	0.00250183	233	93132	4.12767e-27
1019_A2	12:25398279_C/T	KRAS:p.V14I	A[C>T]G	0.00263416	411	156027	2.59915e-31
1019_A3	12:25398279_C/T	KRAS:p.V14I	A[C>T]G	0.000265041	9	33957	0.999998
1019_BL1	12:25398279_C/T	KRAS:p.V14I	A[C>T]G	0.000436918	37	84684	1
1019_BL2	12:25398279_C/T	KRAS:p.V14I	A[C>T]G	0.000624171	64	102536	1
1019_A1	1:115258748_C/A	NRAS:p.G12C	C[C>A]T	2.3769e-05	10	420716	0.999197
1019_A2	1:115258748_C/A	NRAS:p.G12C	C[C>A]T	9.56615e-05	83	867643	0.994963
1019_A3	1:115258748_C/A	NRAS:p.G12C	C[C>A]T	0.000594778	143	240426	1.11002e-13
1019_BL1	1:115258748_C/A	NRAS:p.G12C	C[C>A]T	0.000139101	35	251615	0.983882
1019_BL2	1:115258748_C/A	NRAS:p.G12C	C[C>A]T	0.000169957	145	853155	0.960332
1019_A1	1:115258747_C/T	NRAS:p.G12D	A[C>T]C	0.00132978	559	420369	3.36907e-55
1019_A2	1:115258747_C/T	NRAS:p.G12D	A[C>T]C	8.75163e-05	76	868410	0.991924
1019_A3	1:115258747_C/T	NRAS:p.G12D	A[C>T]C	3.32962e-05	8	240268	0.993726
1019_BL1	1:115258747_C/T	NRAS:p.G12D	A[C>T]C	3.1725e-05	8	252167	0.994586
1019_BL2	1:115258747_C/T	NRAS:p.G12D	A[C>T]C	3.85779e-05	33	855413	0.995312
1020_A1	5:112175419_T/G	APC:p.Y1376*	A[T>G]G	0.00014698	17	115662	0.983455
1020_BL1	5:112175419_T/G	APC:p.Y1376*	A[T>G]G	NA	0	0	NA
1020_BL2	5:112175419_T/G	APC:p.Y1376*	A[T>G]G	NA	234	738	NA
1020_BL3	5:112175419_T/G	APC:p.Y1376*	A[T>G]G	0.345395	266789	772416	0.000340447
1020_P1	5:112175419_T/G	APC:p.Y1376*	A[T>G]G	0.311019	66160	212720	0.757032
1020_A1	12:25398282_C/A	KRAS:p.G13C	C[C>A]A	2.74441e-05	4	145751	1
1020_BL1	12:25398282_C/A	KRAS:p.G13C	C[C>A]A	NA	0	8034	NA
1020_BL2	12:25398282_C/A	KRAS:p.G13C	C[C>A]A	0.00168969	533	315443	1.03163e-42
1020_BL3	12:25398282_C/A	KRAS:p.G13C	C[C>A]A	2.31993e-05	3	129314	1
1020_P1	12:25398282_C/A	KRAS:p.G13C	C[C>A]A	5.10087e-05	8	156836	1
1020_A1	12:25398262_C/A	KRAS:p.L19F	T[C>A]A	0.000127776	37	289570	1
1020_BL1	12:25398262_C/A	KRAS:p.L19F	T[C>A]A	NA	11	17359	NA
1020_BL2	12:25398262_C/A	KRAS:p.L19F	T[C>A]A	0.000512725	343	668974	3.46611e-05
1020_BL3	12:25398262_C/A	KRAS:p.L19F	T[C>A]A	0.000694654	193	277836	1.26323e-09
1020_P1	12:25398262_C/A	KRAS:p.L19F	T[C>A]A	0.00014767	46	311506	0.999977
1020_A1	12:25380275_T/A	KRAS:p.Q61H	C[T>A]T	0.000109092	27	247498	0.983659
1020_BL1	12:25380275_T/A	KRAS:p.Q61H	C[T>A]T	5.76094e-05	57	989422	0.992854
1020_BL2	12:25380275_T/A	KRAS:p.Q61H	C[T>A]T	7.11503e-05	71	997888	0.990345
1020_BL3	12:25380275_T/A	KRAS:p.Q61H	C[T>A]T	7.61873e-05	76	997542	0.989677
1020_P1	12:25380275_T/A	KRAS:p.Q61H	C[T>A]T	8.04229e-05	30	373028	0.993568
1020_A1	12:25380277_G/T	KRAS:p.Q61K	T[C>A]A	8.53149e-05	21	246147	0.999736
1020_BL1	12:25380277_G/T	KRAS:p.Q61K	T[C>A]A	0.0039466	3888	985151	3.62673e-173
1020_BL2	12:25380277_G/T	KRAS:p.Q61K	T[C>A]A	2.01227e-05	20	993903	1
1020_BL3	12:25380277_G/T	KRAS:p.Q61K	T[C>A]A	3.62451e-05	36	993238	0.999998
1020_P1	12:25380277_G/T	KRAS:p.Q61K	T[C>A]A	0.000105159	39	370867	0.999441
1020_A1	12:25398260_G/A	KRAS:p.T20M	A[C>T]G	0.00102277	294	287456	0.387738
1020_BL1	12:25398260_G/A	KRAS:p.T20M	A[C>T]G	NA	3	17380	NA
1020_BL2	12:25398260_G/A	KRAS:p.T20M	A[C>T]G	0.00435799	2915	668887	1.42868e-12
1020_BL3	12:25398260_G/A	KRAS:p.T20M	A[C>T]G	0.00305601	857	280431	1.25125e-09
1020_P1	12:25398260_G/A	KRAS:p.T20M	A[C>T]G	0.000255443	79	309267	0.989826
1020_A1	12:25398279_C/T	KRAS:p.V14I	A[C>T]G	0.000493198	72	145986	1
1020_BL1	12:25398279_C/T	KRAS:p.V14I	A[C>T]G	NA	2	8894	NA
1020_BL2	12:25398279_C/T	KRAS:p.V14I	A[C>T]G	0.00389351	1336	343135	4.20835e-41
1020_BL3	12:25398279_C/T	KRAS:p.V14I	A[C>T]G	0.000888038	129	145264	0.176038
1020_P1	12:25398279_C/T	KRAS:p.V14I	A[C>T]G	0.00287036	451	157123	4.9806e-36
1020_A1	3:178936091_G/A	PIK3CA:p.E545K	T[C>T]A	0.00292453	169	57787	1.79386e-51
1020_BL1	3:178936091_G/A	PIK3CA:p.E545K	T[C>T]A	NA	18	582	NA
1020_BL2	3:178936091_G/A	PIK3CA:p.E545K	T[C>T]A	NA	37	3330	NA
1020_BL3	3:178936091_G/A	PIK3CA:p.E545K	T[C>T]A	0.000108458	106	977338	0.997306
1020_P1	3:178936091_G/A	PIK3CA:p.E545K	T[C>T]A	0.000441368	288	652516	0.97405
1021_A1	5:112173704_C/T	APC:p.R805*	T[C>T]G	0.000208872	123	588878	0.98805
1021_BL1	5:112173704_C/T	APC:p.R805*	T[C>T]G	0.214628	213097	992867	0
1021_BL2	5:112173704_C/T	APC:p.R805*	T[C>T]G	0.334703	332581	993660	0
1021_P1	5:112173704_C/T	APC:p.R805*	T[C>T]G	0.400717	397044	990834	0
1021_P2	5:112173704_C/T	APC:p.R805*	T[C>T]G	NA	0	0	NA
1021_A1	12:25398284_C/T	KRAS:p.G12D	A[C>T]C	2.2648e-05	1	44154	0.990054
1021_BL1	12:25398284_C/T	KRAS:p.G12D	A[C>T]C	5.09463e-05	4	78514	0.990055
1021_BL2	12:25398284_C/T	KRAS:p.G12D	A[C>T]C	0.00113484	141	124247	2.15328e-22
1021_P1	12:25398284_C/T	KRAS:p.G12D	A[C>T]C	7.09391e-05	20	281932	0.999997
1021_P2	12:25398284_C/T	KRAS:p.G12D	A[C>T]C	8.17227e-05	2	24473	0.989903
1021_A1	12:25398284_C/A	KRAS:p.G12V	A[C>A]C	0	0	44154	0.989981
1021_BL1	12:25398284_C/A	KRAS:p.G12V	A[C>A]C	0.000165576	13	78514	0.786042
1021_BL2	12:25398284_C/A	KRAS:p.G12V	A[C>A]C	0.000128776	16	124247	0.912795
1021_P1	12:25398284_C/A	KRAS:p.G12V	A[C>A]C	0.000216364	61	281932	0.113779
1021_P2	12:25398284_C/A	KRAS:p.G12V	A[C>A]C	0.00110326	27	24473	3.23711e-12
1021_A1	12:25398262_C/A	KRAS:p.L19F	T[C>A]A	9.13065e-05	8	87617	0.999937
1021_BL1	12:25398262_C/A	KRAS:p.L19F	T[C>A]A	0.000785738	135	171813	3.25208e-14
1021_BL2	12:25398262_C/A	KRAS:p.L19F	T[C>A]A	0.000741961	204	274947	1.8969e-11
1021_P1	12:25398262_C/A	KRAS:p.L19F	T[C>A]A	0.000746504	462	618885	0.0266191
1021_P2	12:25398262_C/A	KRAS:p.L19F	T[C>A]A	0.000833843	45	53967	6.34822e-14
1021_A1	12:25380277_G/T	KRAS:p.Q61K	T[C>A]A	1.81554e-05	18	991439	1
1021_BL1	12:25380277_G/T	KRAS:p.Q61K	T[C>A]A	0.00218013	2151	986639	7.16285e-85
1021_BL2	12:25380277_G/T	KRAS:p.Q61K	T[C>A]A	0.00215755	2129	986766	8.73559e-84
1021_P1	12:25380277_G/T	KRAS:p.Q61K	T[C>A]A	0.00359243	3523	980673	5.51822e-155
1021_P2	12:25380277_G/T	KRAS:p.Q61K	T[C>A]A	0.00380801	3746	983715	2.9073e-166
1021_A1	12:25398260_G/A	KRAS:p.T20M	A[C>T]G	8.05033e-05	7	86953	0.990517
1021_BL1	12:25398260_G/A	KRAS:p.T20M	A[C>T]G	0.000104307	18	172567	0.990523
1021_BL2	12:25398260_G/A	KRAS:p.T20M	A[C>T]G	0.000116282	32	275192	0.990202
1021_P1	12:25398260_G/A	KRAS:p.T20M	A[C>T]G	0.00261969	1634	623738	3.61352e-06
1021_P2	12:25398260_G/A	KRAS:p.T20M	A[C>T]G	0.00366124	198	54080	4.67666e-13
1021_A1	12:25398279_C/T	KRAS:p.V14I	A[C>T]G	0.00015811	7	44273	1
1021_BL1	12:25398279_C/T	KRAS:p.V14I	A[C>T]G	0.000819812	72	87825	0.951147
1021_BL2	12:25398279_C/T	KRAS:p.V14I	A[C>T]G	0.00119101	166	139378	8.87411e-06
1021_P1	12:25398279_C/T	KRAS:p.V14I	A[C>T]G	0.000404802	128	316204	1
1021_P2	12:25398279_C/T	KRAS:p.V14I	A[C>T]G	0.000328	9	27439	1
1021_A1	3:178936091_G/A	PIK3CA:p.E545K	T[C>T]A	0.0095418	5693	596638	0
1021_BL1	3:178936091_G/A	PIK3CA:p.E545K	T[C>T]A	0.296218	213389	720378	0
1021_BL2	3:178936091_G/A	PIK3CA:p.E545K	T[C>T]A	0.459792	424339	922894	0
1021_P1	3:178936091_G/A	PIK3CA:p.E545K	T[C>T]A	0.3832	238637	622748	0
1021_P2	3:178936091_G/A	PIK3CA:p.E545K	T[C>T]A	0.323104	306903	949858	0
