# Supplementary material for: Longitudinal Liquid Biopsy and Mathematical Modeling of Clonal Evolution Forecast Time to Treatment Failure in the PROSPECT-C Phase II Colorectal Cancer Clinical Trial
Source: Oxford University Press journal article supplement (doi:10.1158/2159-8290.cd-17-0891), 2018-08-30
Supplement: 21598290cd170891-sup-187448_3_supp_4835836_pcjdcj.xlsx [file 21598290cd170891-sup-187448_3_supp_4835836_pcjdcj.xlsx]

## Sheet: 1002
Well	ExptType	Experiment	PT ID	Sample	TargetType	Target	Status	Conc(copies/L)	Supermix	Copies/20LWell	TotalConfMax	TotalConfMin	PoissonConfMax	PoissonConfMin	Positives	FA%	Negatives	Ch1+Ch2+	Ch1+Ch2-	Ch1-Ch2+	Ch1-Ch2-	Linkage	AcceptedDroplets	CNV	TotalCNVMax	TotalCNVMin	PoissonCNVMax	PoissonCNVMin	ReferenceCopies	UnknownCopies	Threshold	Ratio	TotalRatioMax	TotalRatioMin	PoissonRatioMax	PoissonRatioMin	FractionalAbundance	TotalFractionalAbundanceMax	TotalFractionalAbundanceMin	PoissonFractionalAbundanceMax	PoissonFractionalAbundanceMin	ReferenceAssayNumber	TargetAssayNumber	MeanAmplitudeofPositives	MeanAmplitudeofNegatives	MeanAmplitudeTotal	ExperimentComments	MergedWells	TotalConfMax68
B02	Absolute Quantification	ABS	1002	20/02/2013 BL	Ch1Unknown	KRAS G12D	OK	1.4	ddPCR Supermix for Probes (no dUTP)	28			2.2	0.9	17	2.07824	13915	3	14	798	13117	0.181	13932								826	0.021			0.031	0.011	2			3	1.1	1	1	2160.8	566.75	568.69
B02	Absolute Quantification	ABS	1002	20/02/2013 BL	Ch2Unknown	KRAS G12D	OK	69.7	ddPCR Supermix for Probes (no dUTP)	1394			74.5	64.8	801		13131	3	14	798	13117	0.181	13932								1573	0.021			0.031	0.011	2			3	1.1	1	1	2278.1	1038.4	1109.7
E02	Absolute Quantification	ABS	1002	2013-03-19	Ch1Unknown	KRAS G12D	Manual	2.3	ddPCR Supermix for Probes (no dUTP)	46			3.2	1.5	28	2.98507	14461	0	28	910	13551	0	14489								1200	0.03			0.041	0.019	2.9			4	1.8	1	1	2280.6	786.42	789.31
E02	Absolute Quantification	ABS	1002	2013-03-19	Ch2Unknown	KRAS G12D	Manual	76.3	ddPCR Supermix for Probes (no dUTP)	1526			81.3	71.4	910		13579	0	28	910	13551	0	14489								1822	0.03			0.041	0.019	2.9			4	1.8	1	1	2669.5	1149.5	1245
G02	Absolute Quantification	ABS	1002	16/04/2013 PD	Ch1Unknown	KRAS G12D	Manual	3.6	ddPCR Supermix for Probes (no dUTP)	72			4.7	2.7	47	3.91341	15330	0	47	1154	14176	0	15377								1382	0.039			0.051	0.028	3.8			4.8	2.7	1	1	3375.2	886.45	894.06
G02	Absolute Quantification	ABS	1002	16/04/2013 PD	Ch2Unknown	KRAS G12D	Manual	92	ddPCR Supermix for Probes (no dUTP)	1840			97	86	1154		14223	0	47	1154	14176	0	15377								1916	0.039			0.051	0.028	3.8			4.8	2.7	1	1	2485.2	1177.4	1275.5
G03	Absolute Quantification	ABS	1002	16/04/2013 PD	Ch1Unknown	KRAS Q61H a-c	Manual	2	ddPCR Supermix for Probes (no dUTP)	40			3	1.3	22	1.5919	12881	1	21	1359	11522	0	12903								1235	0.015			0.022	0.009	1.5			2.1	0.9	1	1	3455.3	929.49	933.8
G03	Absolute Quantification	ABS	1002	16/04/2013 PD	Ch2Unknown	KRAS Q61H a-c	Manual	131	ddPCR Supermix for Probes (no dUTP)	2620			138	124	1360		11543	1	21	1359	11522	0	12903								1849	0.015			0.022	0.009	1.5			2.1	0.9	1	1	2426.6	1188.3	1318.8
[truncated: 15 more columns]

## Sheet: 1003
Well	ExptType	Experiment	PT ID	Sample	TargetType	Target	Status	Conc(copies/L)	Supermix	Copies/20LWell	TotalConfMax	TotalConfMin	PoissonConfMax	PoissonConfMin	Positives	FA (%)	Negatives	Ch1+Ch2+	Ch1+Ch2-	Ch1-Ch2+	Ch1-Ch2-	Linkage	AcceptedDroplets	CNV	TotalCNVMax	TotalCNVMin	PoissonCNVMax	PoissonCNVMin	ReferenceCopies	UnknownCopies	Threshold	Ratio	TotalRatioMax	TotalRatioMin	PoissonRatioMax	PoissonRatioMin	FractionalAbundance	TotalFractionalAbundanceMax	TotalFractionalAbundanceMin	PoissonFractionalAbundanceMax	PoissonFractionalAbundanceMin	ReferenceAssayNumber	TargetAssayNumber	MeanAmplitudeofPositives	MeanAmplitudeofNegatives	MeanAmplitudeTotal	ExperimentComments	MergedWells	TotalConfMax68
F01	Absolute Quantification	ABS	1003	2014-03-03	Ch1Unknown	KRAS G13D	Manual	2.4	ddPCR Supermix for Probes (no dUTP)	48			3.5	1.6	25	1.77557	12145	2	23	1381	10764	0	12170								1119	0.017			0.024	0.01	1.7			2.3	1	1	1	2657	719.91	723.89
F01	Absolute Quantification	ABS	1003	2014-03-03	Ch2Unknown	KRAS G13D	Manual	142	ddPCR Supermix for Probes (no dUTP)	2840			149	134	1383		10787	2	23	1381	10764	0	12170								1690	0.017			0.024	0.01	1.7			2.3	1	1	1	2183.9	1114.3	1235.8
H01	Absolute Quantification	ABS	1003	2014-04-28	Ch1Unknown	KRAS G13D	Manual	2.6	ddPCR Supermix for Probes (no dUTP)	52			3.8	1.8	27	1.81208	12083	0	27	1463	10620	0	12110								827	0.017			0.024	0.011	1.7			2.3	1.1	1	1	1794.9	661.29	663.82
H01	Absolute Quantification	ABS	1003	2014-04-28	Ch2Unknown	KRAS G13D	Manual	151	ddPCR Supermix for Probes (no dUTP)	3020			159	144	1463		10647	0	27	1463	10620	0	12110								1569	0.017			0.024	0.011	1.7			2.3	1.1	1	1	1984.9	1083.9	1192.8
E01	Absolute Quantification	ABS	1003	13/05/2014 PD	Ch1Unknown	KRAS G13D	Manual	2.7	ddPCR Supermix for Probes (no dUTP)	54			3.8	1.8	28	2.72374	12331	1	27	999	11332	0	12359								771	0.027			0.037	0.017	2.6			3.6	1.7	1	1	1882.4	582.72	585.67
E01	Absolute Quantification	ABS	1003	13/05/2014 PD	Ch2Unknown	KRAS G13D	Manual	99	ddPCR Supermix for Probes (no dUTP)	1980			105	93	1000		11359	1	27	999	11332	0	12359								1590	0.027			0.037	0.017	2.6			3.6	1.7	1	1	2245.5	1099	1191.7
B01	Absolute Quantification	ABS	1003	13/05/2014 PD	Ch1Unknown	KRAS G12D	Manual	1.2	ddPCR Supermix for Probes (no dUTP)	24			2	0.6	12	0.894188	12032	1	11	1329	10703	0	12044								757	0.0085			0.0134	0.0036	0.84			1.33	0.36	1	1	2024.5	540.19	541.67
B01	Absolute Quantification	ABS	1003	13/05/2014 PD	Ch2Unknown	KRAS G12D	Manual	138	ddPCR Supermix for Probes (no dUTP)	2760			145	130	1330		10714	1	11	1329	10703	0	12044								1566	0.0085			0.0134	0.0036	0.84			1.33	0.36	1	1	2008	1065.7	1169.8
[truncated: 15 more columns]

## Sheet: 1004
Well	ExptType	Experiment	PT ID	Sample	TargetType	Target	Status	Concentration	Supermix	CopiesPer20uLWell	TotalConfMax	TotalConfMin	PoissonConfMax	PoissonConfMin	Positives	FA (%)	Negatives	Ch1+Ch2+	Ch1+Ch2-	Ch1-Ch2+	Ch1-Ch2-	Linkage	AcceptedDroplets	CNV	TotalCNVMax	TotalCNVMin	PoissonCNVMax	PoissonCNVMin	ReferenceCopies	UnknownCopies	Ratio	TotalRatioMax	TotalRatioMin	PoissonRatioMax	PoissonRatioMin	FractionalAbundance	TotalFractionalAbundanceMax	TotalFractionalAbundanceMin	PoissonFractionalAbundanceMax	PoissonFractionalAbundanceMin	ReferenceAssayNumber	TargetAssayNumber	Threshold	MeanAmplitudeofPositives	MeanAmplitudeofNegatives	MeanAmplitudeTotal	ExperimentComments	MergedWells	TotalConfMax68
F01	Absolute Quantification	ABS	1004	09/09/2013 BL	Ch1Unknown	KRAS G12D	Manual	0	ddPCR Supermix for Probes (no dUTP)	0			0.26	0	0	0	13749	0	0	122	13627	0	13749																		1	1	2000	0	859.95	859.95
F01	Absolute Quantification	ABS	1004	09/09/2013 BL	Ch2Unknown	KRAS wt	Manual	10.5	ddPCR Supermix for Probes (no dUTP)	210			12.3	8.6	122		13627	0	0	122	13627	0	13749																		1	1	2000	4439.9	1196.5	1225.3
E03	Absolute Quantification	ABS	1004	2013-10-07	Ch1Unknown	KRAS G12D	Manual	0	ddPCR Supermix for Probes (no dUTP)	0			0.26	0	0	0	13503	0	0	1739	11764	0	13503																		1	1	2000	0	853.67	853.67
E03	Absolute Quantification	ABS	1004	2013-10-07	Ch2Unknown	KRAS wt	Manual	162	ddPCR Supermix for Probes (no dUTP)	3240			170	155	1739		11764	0	0	1739	11764	0	13503																		1	1	2000	2952.1	1203.4	1428.6
F01	Absolute Quantification	ABS	1004	2013-11-11	Ch1Unknown	KRAS G12D	Manual	0	ddPCR Supermix for Probes (no dUTP)	0			0.29	0	0	0	12067	0	0	225	11842	0	12067																		1	1	2000	0	868.29	868.29
F01	Absolute Quantification	ABS	1004	2013-11-11	Ch2Unknown	KRAS wt	Manual	22.1	ddPCR Supermix for Probes (no dUTP)	442			25	19.3	225		11842	0	0	225	11842	0	12067																		1	1	2000	4100.1	1185.8	1240.1
G01	Absolute Quantification	ABS	1004	09/12/2013 PD	Ch1Unknown	KRAS G12D	Manual	0.8	ddPCR Supermix for Probes (no dUTP)	16			1.6	0.4	8	0.0736988	11123	8	0	10839	284	0.846	11131								0.0002			0.00034	6e-05	0.02			0.034	0.006	1	1	2000	2479.5	1199.1	1200
G01	Absolute Quantification	ABS	1004	09/12/2013 PD	Ch2Unknown	KRAS wt	Manual	4320	ddPCR Supermix for Probes (no dUTP)	86400			4460	4190	10847		284	8	0	10839	284	0.846	11131								0.0002			0.00034	6e-05	0.02			0.034	0.006	1	1	2000	4525.5	1320.1	4443.7
F01	Absolute Quantification	ABS	1004	09/09/2013 BL	Ch1Unknown	KRAS G13D	Manual	0	ddPCR Supermix for Probes (no dUTP)	0			0.31	0	0	0	11446	0	0	119	11327	0	11446																		1	1	1800	0	970.49	970.49
F01	Absolute Quantification	ABS	1004	09/09/2013 BL	Ch2Unknown	KRAS wt	Manual	12.3	ddPCR Supermix for Probes (no dUTP)	246			14.5	10.1	119		11327	0	0	119	11327	0	11446																		1	1	2000	4188.1	1117	1148.9
H03	Absolute Quantification	ABS	1004	2013-10-07	Ch1Unknown	KRAS G13D	Manual	0	ddPCR Supermix for Probes (no dUTP)	0			0.25	0	0	0	14380	0	0	1452	12928	0	14380																		1	1	2000	0	473.49	473.49
H03	Absolute Quantification	ABS	1004	2013-10-07	Ch2Unknown	KRAS wt	Manual	125	ddPCR Supermix for Probes (no dUTP)	2500			132	119	1452		12928	0	0	1452	12928	0	14380																		1	1	2200	3002.5	1102.4	1294.2
G04	Absolute Quantification	ABS	1004	2013-11-11	Ch1Unknown	KRAS G13D	Manual	0	ddPCR Supermix for Probes (no dUTP)	0			0.26	0	0	0	13430	0	0	244	13186	0	13430																		1	1	1800	0	974.75	974.75
G04	Absolute Quantification	ABS	1004	2013-11-11	Ch2Unknown	KRAS wt	Manual	21.6	ddPCR Supermix for Probes (no dUTP)	432			24.3	18.9	244		13186	0	0	244	13186	0	13430																		1	1	2000	4052.4	1139.1	1192
G01	Absolute Quantification	ABS	1004	09/12/2013 PD	Ch1Unknown	KRAS G13D	Manual	1.1	ddPCR Supermix for Probes (no dUTP)	22			1.9	0.6	11	0.101918	11550	11	0	10771	779	1.12	11561								0.00035			0.00057	0.00014	0.035			0.057	0.014	1	1	1800	2473.3	1233	1234.2
G01	Absolute Quantification	ABS	1004	09/12/2013 PD	Ch2Unknown	KRAS wt	Manual	3170	ddPCR Supermix for Probes (no dUTP)	63400			3260	3100	10782		779	11	0	10771	779	1.12	11561								0.00035			0.00057	0.00014	0.035			0.057	0.014	1	1	2000	4607.2	1279.1	4382.9
[truncated: 15 more columns]

## Sheet: 1006
Well	ExptType	Experiment	PT ID	Sample	TargetType	Target	Status	Conc(copies/L)	Supermix	Copies/20LWell	TotalConfMax	TotalConfMin	PoissonConfMax	PoissonConfMin	Positives	FA (%)	Negatives	Ch1+Ch2+	Ch1+Ch2-	Ch1-Ch2+	Ch1-Ch2-	Linkage	AcceptedDroplets	CNV	TotalCNVMax	TotalCNVMin	PoissonCNVMax	PoissonCNVMin	ReferenceCopies	UnknownCopies	Threshold	Ratio	TotalRatioMax	TotalRatioMin	PoissonRatioMax	PoissonRatioMin	FractionalAbundance	TotalFractionalAbundanceMax	TotalFractionalAbundanceMin	PoissonFractionalAbundanceMax	PoissonFractionalAbundanceMin	ReferenceAssayNumber	TargetAssayNumber	MeanAmplitudeofPositives	MeanAmplitudeofNegatives	MeanAmplitudeTotal	ExperimentComments	MergedWells	TotalConfMax68
G01	Absolute Quantification	ABS	1006	14/10/13 BL	Ch1Unknown	KRAS G12D	Manual	0	ddPCR Supermix for Probes (no dUTP)	0			0.25	0	0	0	14379	0	0	3183	11196	0	14379								0											1	1	0	390.91	390.91
G01	Absolute Quantification	ABS	1006	14/10/13 BL	Ch2Unknown	KRAS G12D	Manual	294	ddPCR Supermix for Probes (no dUTP)	5880			305	284	3183		11196	0	0	3183	11196	0	14379								2179											1	1	3068.8	1235	1641
H01	Absolute Quantification	ABS	1006	2013-11-13	Ch1Unknown	KRAS G12D	Manual	0	ddPCR Supermix for Probes (no dUTP)	0			0.25	0	0	0	14162	0	0	4067	10095	0	14162								0											1	1	0	346.74	346.74
H01	Absolute Quantification	ABS	1006	2013-11-13	Ch2Unknown	KRAS G12D	Manual	398	ddPCR Supermix for Probes (no dUTP)	7960			411	386	4067		10095	0	0	4067	10095	0	14162								2310											1	1	3123.1	1285	1812.8
F01	Absolute Quantification	ABS	1006	2013-12-11	Ch1Unknown	KRAS G12D	Manual	1.3	ddPCR Supermix for Probes (no dUTP)	26			2.1	0.8	16	0.471004	14423	0	16	3381	11042	0	14439								1139	0.0042			0.0062	0.0021	0.41			0.62	0.21	1	1	3740.6	352.01	355.77
F01	Absolute Quantification	ABS	1006	2013-12-11	Ch2Unknown	KRAS G12D	Manual	314	ddPCR Supermix for Probes (no dUTP)	6280			325	303	3381		11058	0	16	3381	11042	0	14439								2166	0.0042			0.0062	0.0021	0.41			0.62	0.21	1	1	3048.2	1195.3	1629.2
C01	Absolute Quantification	ABS	1006	31/12/2013 PD	Ch1Unknown	KRAS G12D	OK	1.4	ddPCR Supermix for Probes (no dUTP)	28			2.2	0.8	17	0.748899	14226	0	17	2253	11973	0	14243								1022	0.0069			0.0103	0.0036	0.69			1.02	0.36	1	1	2886.6	426.81	429.75
C01	Absolute Quantification	ABS	1006	31/12/2013 PD	Ch2Unknown	KRAS G12D	OK	203	ddPCR Supermix for Probes (no dUTP)	4060			211	194	2253		11990	0	17	2253	11973	0	14243								2005	0.0069			0.0103	0.0036	0.69			1.02	0.36	1	1	3099.3	1229.7	1525.4
[truncated: 15 more columns]

## Sheet: 1007
Well	ExptType	Experiment	PT ID	Sample	TargetType	Target	Status	Conc(copies/L)	Supermix	Copies/20LWell	TotalConfMax	TotalConfMin	PoissonConfMax	PoissonConfMin	Positives	FA%	Negatives	Ch1+Ch2+	Ch1+Ch2-	Ch1-Ch2+	Ch1-Ch2-	Linkage	AcceptedDroplets	CNV	TotalCNVMax	TotalCNVMin	PoissonCNVMax	PoissonCNVMin	ReferenceCopies	UnknownCopies	Threshold	Ratio	TotalRatioMax	TotalRatioMin	PoissonRatioMax	PoissonRatioMin	FractionalAbundance	TotalFractionalAbundanceMax	TotalFractionalAbundanceMin	PoissonFractionalAbundanceMax	PoissonFractionalAbundanceMin	ReferenceAssayNumber	TargetAssayNumber	MeanAmplitudeofPositives	MeanAmplitudeofNegatives	MeanAmplitudeTotal	ExperimentComments	MergedWells	TotalConfMax68
D01	Absolute Quantification	ABS	1007	2014-02-18	Ch1Unknown	KRAS G12D	Manual	0	ddPCR Supermix for Probes (no dUTP)	0			0.32	0	0	0	10901	0	0	219	10682	0	10901								0											1	1	0	530.96	530.96
D01	Absolute Quantification	ABS	1007	2014-02-18	Ch2Unknown	KRAS G12D	Manual	23.9	ddPCR Supermix for Probes (no dUTP)	478			27	20.7	219		10682	0	0	219	10682	0	10901								1707											1	1	2429.6	1150.6	1176.3
B01	Absolute Quantification	ABS	1007	2014-03-20	Ch1Unknown	KRAS G12D	Manual	0	ddPCR Supermix for Probes (no dUTP)	0			0.36	0	0	0	9875	0	0	250	9625	0	9875								0											1	1	0	447.09	447.09
B01	Absolute Quantification	ABS	1007	2014-03-20	Ch2Unknown	KRAS G12D	Manual	30.2	ddPCR Supermix for Probes (no dUTP)	604			33.9	26.4	250		9625	0	0	250	9625	0	9875								1583											1	1	2372	1110.3	1142.2
A01	Absolute Quantification	ABS	1007	2014-04-17	Ch1Unknown	KRAS G12D	Manual	0	ddPCR Supermix for Probes (no dUTP)	0			0.39	0	0	0	8989	0	0	12	8977	0	8989								0											1	1	0	485.35	485.35
A01	Absolute Quantification	ABS	1007	2014-04-17	Ch2Unknown	KRAS G12D	Manual	1.6	ddPCR Supermix for Probes (no dUTP)	32			2.6	0.8	12		8977	0	0	12	8977	0	8989								0											1	1	1455.2	1100.7	1101.2
F01	Absolute Quantification	ABS	1007	2014-05-15	Ch1Unknown	KRAS G12D	Manual	0.19	ddPCR Supermix for Probes (no dUTP)	3.8			0.62	0.03	2	0.533333	12096	0	2	373	11723	0	12098								0	0.005			0.013	0	0.5			1.3	0	1	1	1273.9	1035.7	1035.7
F01	Absolute Quantification	ABS	1007	2014-05-15	Ch2Unknown	KRAS G12D	Manual	36.8	ddPCR Supermix for Probes (no dUTP)	736			40.6	33.1	373		11725	0	2	373	11723	0	12098								2030	0.005			0.013	0	0.5			1.3	0	1	1	3424	1298.9	1364.4
E01	Absolute Quantification	ABS	1007	2014-05-29	Ch1Unknown	KRAS G12D	OK	0.3	ddPCR Supermix for Probes (no dUTP)	6			0.78	0.07	3	0.767263	11940	1	2	387	11553	0.0919	11943								1336	0.008			0.017	0	0.8			1.7	0	1	1	2894.3	1051.6	1052
E01	Absolute Quantification	ABS	1007	2014-05-29	Ch2Unknown	KRAS G12D	OK	38.9	ddPCR Supermix for Probes (no dUTP)	778			42.7	35	388		11555	1	2	387	11553	0.0919	11943								2019	0.008			0.017	0	0.8			1.7	0	1	1	3417.9	1272.3	1342
H01	Absolute Quantification	ABS	1007	2014-06-26	Ch1Unknown	KRAS G12D	OK	1.1	ddPCR Supermix for Probes (no dUTP)	22			1.9	0.6	11	1.73776	11505	0	11	622	10883	0	11516								2131	0.017			0.028	0.007	1.7			2.7	0.7	1	1	4596.2	1673.2	1676
H01	Absolute Quantification	ABS	1007	2014-06-26	Ch2Unknown	KRAS G12D	OK	65	ddPCR Supermix for Probes (no dUTP)	1300			70	60	622		10894	0	11	622	10883	0	11516								2311	0.017			0.028	0.007	1.7			2.7	0.7	1	1	4007.7	1404.1	1544.7
G01	Absolute Quantification	ABS	1007	10/07/2014 PD	Ch1Unknown	KRAS G12D	OK	1.4	ddPCR Supermix for Probes (no dUTP)	28			2.2	0.8	14	29.1667	11934	4	10	30	11904	0.391	11948								2125	0.41			0.67	0.15	29			42	16	1	1	4013.1	1561	1563.9
G01	Absolute Quantification	ABS	1007	10/07/2014 PD	Ch2Unknown	KRAS G12D	OK	3.4	ddPCR Supermix for Probes (no dUTP)	68			4.6	2.3	34		11914	4	10	30	11904	0.391	11948								1907	0.41			0.67	0.15	29			42	16	1	1	3775.1	1366.2	1373
B03	Absolute Quantification	ABS	1007	14/10/2013 BL	Ch1Unknown	Q61H A-T	CHECK	No Call	ddPCR Supermix for Probes (no dUTP)						0	0	12006	0	0	613	11393	0	12006								0											1	1	0	895.78	895.78
B03	Absolute Quantification	ABS	1007	14/10/2013 BL	Ch2Unknown	Q61H A-T	OK	61.7	ddPCR Supermix for Probes (no dUTP)	1234			66.5	56.8	613		11393	0	0	613	11393	0	12006								1640											1	1	2666.6	1124.3	1203.1
A03	Absolute Quantification	ABS	1007	2013-11-14	Ch1Unknown	Q61H A-T	CHECK	No Call	ddPCR Supermix for Probes (no dUTP)						0	0	11541	0	0	577	10964	0	11541								0											1	1	0	885.05	885.05
A03	Absolute Quantification	ABS	1007	2013-11-14	Ch2Unknown	Q61H A-T	OK	60.3	ddPCR Supermix for Probes (no dUTP)	1206			65.3	55.4	577		10964	0	0	577	10964	0	11541								1672											1	1	2723.7	1131.9	1211.5
B02	Absolute Quantification	ABS	1007	2013-12-10	Ch1Unknown	Q61H A-T	CHECK	No Call	ddPCR Supermix for Probes (no dUTP)						0	0	11435	0	0	543	10892	0	11435								0											1	1	0	1273.2	1273.2
B02	Absolute Quantification	ABS	1007	2013-12-10	Ch2Unknown	Q61H A-T	OK	57.2	ddPCR Supermix for Probes (no dUTP)	1144			62.1	52.4	543		10892	0	0	543	10892	0	11435								1892											1	1	3190.8	1247.8	1340
E02	Absolute Quantification	ABS	1007	07/01/2014 PR	Ch1Unknown	Q61H A-T	Manual	0.48	ddPCR Supermix for Probes (no dUTP)	9.6			1.04	0.17	5	0.580046	12234	2	3	855	11379	0.171	12239								0	0.006			0.011	0	0.6			1.1	0.1	1	1	3192.6	1512.3	1513
E02	Absolute Quantification	ABS	1007	07/01/2014 PR	Ch2Unknown	Q61H A-T	Manual	85	ddPCR Supermix for Probes (no dUTP)	1700			91	80	857		11382	2	3	855	11379	0.171	12239								2207	0.006			0.011	0	0.6			1.1	0.1	1	1	3725.1	1346.4	1513
C02	Absolute Quantification	ABS	1007	2014-01-21	Ch1Unknown	Q61H A-T	Manual	0.2	ddPCR Supermix for Probes (no dUTP)	4			0.65	0.03	2	0.366972	11532	0	2	543	10989	0	11534								0	0.0036			0.0091	0	0.36			0.9	0	1	1	2114.3	1288.1	1288.2
C02	Absolute Quantification	ABS	1007	2014-01-21	Ch2Unknown	Q61H A-T	Manual	56.7	ddPCR Supermix for Probes (no dUTP)	1134			61.5	52	543		10991	0	2	543	10989	0	11534								1966	0.0036			0.0091	0	0.36			0.9	0	1	1	3365.8	1291.3	1388.9
F03	Absolute Quantification	ABS	1007	2014-02-18	Ch1Unknown	Q61H A-T	OK	0.48	ddPCR Supermix for Probes (no dUTP)	9.6			1.05	0.17	5	0.625	12145	0	5	795	11350	0	12150								1923	0.006			0.012	0.001	0.6			1.2	0.1	1	1	3024.1	1497.1	1497.8
F03	Absolute Quantification	ABS	1007	2014-02-18	Ch2Unknown	Q61H A-T	OK	80	ddPCR Supermix for Probes (no dUTP)	1600			85	74	795		11355	0	5	795	11350	0	12150								2145	0.006			0.012	0.001	0.6			1.2	0.1	1	1	3545.6	1311.9	1458
E03	Absolute Quantification	ABS	1007	2014-03-20	Ch1Unknown	Q61H A-T	Manual	0.43	ddPCR Supermix for Probes (no dUTP)	8.6			0.94	0.15	5	0.555556	13629	3	2	892	12737	0.247	13634								2035	0.0054			0.0103	0.0005	0.54			1.03	0.05	1	1	3870.4	1631.2	1632
E03	Absolute Quantification	ABS	1007	2014-03-20	Ch2Unknown	Q61H A-T	Manual	80	ddPCR Supermix for Probes (no dUTP)	1600			85	75	895		12739	3	2	892	12737	0.247	13634								2165	0.0054			0.0103	0.0005	0.54			1.03	0.05	1	1	3677.8	1358	1510.3
C03	Absolute Quantification	ABS	1007	2014-04-17	Ch1Unknown	Q61H A-T	Manual	0.3	ddPCR Supermix for Probes (no dUTP)	6			0.78	0.07	3	0.37037	11959	0	3	807	11152	0	11962								0	0.0036			0.0079	0	0.36			0.79	0	1	1	2067.2	1193.2	1193.5
C03	Absolute Quantification	ABS	1007	2014-04-17	Ch2Unknown	Q61H A-T	Manual	82	ddPCR Supermix for Probes (no dUTP)	1640			88	77	807		11155	0	3	807	11152	0	11962								1917	0.0036			0.0079	0	0.36			0.79	0	1	1	3150.5	1236.1	1365.2
F02	Absolute Quantification	ABS	1007	2014-05-15	Ch1Unknown	Q61H A-T	Manual	0.6	ddPCR Supermix for Probes (no dUTP)	12			1.2	0.2	6	0.742574	11618	0	6	802	10816	0	11624								0	0.007			0.013	0.001	0.7			1.3	0.1	1	1	2210.8	1632.7	1633
F02	Absolute Quantification	ABS	1007	2014-05-15	Ch2Unknown	Q61H A-T	Manual	84	ddPCR Supermix for Probes (no dUTP)	1680			90	78	802		10822	0	6	802	10816	0	11624								2190	0.007			0.013	0.001	0.7			1.3	0.1	1	1	3723.4	1373.4	1535.6
D02	Absolute Quantification	ABS	1007	2014-05-29	Ch1Unknown	Q61H A-T	Manual	0.42	ddPCR Supermix for Probes (no dUTP)	8.4			0.99	0.13	4	0.879121	11157	4	0	447	10710	0.422	11161								0	0.009			0.018	0	0.9			1.7	0	1	1	952.6	803.38	803.43
D02	Absolute Quantification	ABS	1007	2014-05-29	Ch2Unknown	Q61H A-T	Manual	48.5	ddPCR Supermix for Probes (no dUTP)	970			53	44.1	451		10710	4	0	447	10710	0.422	11161								1693	0.009			0.018	0	0.9			1.7	0	1	1	2778.7	1153.4	1219.1
G03	Absolute Quantification	ABS	1007	2014-06-26	Ch1Unknown	Q61H A-T	Manual	0.9	ddPCR Supermix for Probes (no dUTP)	18			1.6	0.4	10	1.88679	13153	0	10	520	12633	0	13163								2381	0.019			0.031	0.007	1.9			3	0.7	1	1	5373.3	1605	1607.9
G03	Absolute Quantification	ABS	1007	2014-06-26	Ch2Unknown	Q61H A-T	Manual	47.4	ddPCR Supermix for Probes (no dUTP)	948			51.5	43.4	520		12643	0	10	520	12633	0	13163								2363	0.019			0.031	0.007	1.9			3	0.7	1	1	4259.1	1398.4	1511.4
G02	Absolute Quantification	ABS	1007	10/07/2014 PD	Ch1Unknown	Q61H A-T	OK	1.5	ddPCR Supermix for Probes (no dUTP)	30			2.3	0.8	15	1.59915	12141	1	14	922	11219	0	12156								1876	0.016			0.024	0.008	1.5			2.3	0.8	1	1	3261.3	1387.8	1390.1
G02	Absolute Quantification	ABS	1007	10/07/2014 PD	Ch2Unknown	Q61H A-T	OK	93	ddPCR Supermix for Probes (no dUTP)	1860			99	87	923		11233	1	14	922	11219	0	12156								2273	0.016			0.024	0.008	1.5			2.3	0.8	1	1	3790.2	1320.9	1508.4
[truncated: 15 more columns]

## Sheet: 1008
PT ID	Sample	TargetType	Target	Status	Conc(copies/L)	Supermix	Copies/20LWell	TotalConfMax	TotalConfMin	PoissonConfMax	PoissonConfMin	Positives	FA(%)	Negatives	Ch1+Ch2+	Ch1+Ch2-	Ch1-Ch2+	Ch1-Ch2-	Linkage	AcceptedDroplets	CNV	TotalCNVMax	TotalCNVMin	PoissonCNVMax	PoissonCNVMin	ReferenceCopies	UnknownCopies	Threshold	Ratio	TotalRatioMax	TotalRatioMin	PoissonRatioMax	PoissonRatioMin	FractionalAbundance	TotalFractionalAbundanceMax	TotalFractionalAbundanceMin	PoissonFractionalAbundanceMax	PoissonFractionalAbundanceMin	ReferenceAssayNumber	TargetAssayNumber	MeanAmplitudeofPositives	MeanAmplitudeofNegatives	MeanAmplitudeTotal	ExperimentComments	MergedWells	TotalConfMax68	TotalConfMin68	PoissonConfMax68	PoissonConfMin68
1008	2013-11-15	Ch1Unknown	KRAS G12D	Manual	0	ddPCR Supermix for Probes (no dUTP)	0			0.34	0	0	0	10257	0	0	1101	9156	0	10257								1410											1	1	0	1225.6	1225.6					0.16	0
1008	2013-11-15	Ch2Unknown	KRAS G12D	Manual	134	ddPCR Supermix for Probes (no dUTP)	2680			142	126	1101		9156	0	0	1101	9156	0	10257								2294											1	1	3435	1422.1	1638.1					137.6	129.6
1008	09/12/2013 PD	Ch1Unknown	KRAS G12D	Manual	1	ddPCR Supermix for Probes (no dUTP)	20			1.9	0.4	7	2.6616	8509	0	7	256	8253	0	8516								0	0.027			0.048	0.006	2.6			4.6	0.7	1	1	1304.4	1048.1	1048.3					1.38	0.64
1008	09/12/2013 PD	Ch2Unknown	KRAS G12D	Manual	35.9	ddPCR Supermix for Probes (no dUTP)	718			40.3	31.5	256		8260	0	7	256	8253	0	8516								2236	0.027			0.048	0.006	2.6			4.6	0.7	1	1	3523.5	1470.7	1532.4					38.2	33.7
1008	18/10/2013 BL	Ch1Unknown	KRAS Q61H A-T	Manual	1.6	ddPCR Supermix for Probes (no dUTP)	32			2.8	0.8	11	2.85714	7969	0	11	374	7595	0	7980								0	0.029			0.046	0.011	2.8			4.5	1.1	1	1	1950.7	1469.6	1470.2					2.16	1.18
1008	18/10/2013 BL	Ch2Unknown	KRAS Q61H A-T	Manual	56	ddPCR Supermix for Probes (no dUTP)	1120			62	51	374		7606	0	11	374	7595	0	7980								2269	0.029			0.046	0.011	2.8			4.5	1.1	1	1	3773.7	1492.5	1599.5					59.4	53.6
1008	2013-11-15	Ch1Unknown	KRAS Q61H A-T	Manual	1.4	ddPCR Supermix for Probes (no dUTP)	28			2.4	0.7	10	2.3753	8570	0	10	411	8159	0	8580								0	0.024			0.039	0.009	2.3			3.8	0.9	1	1	2556.5	1549.5	1550.7					1.85	0.98
1008	2013-11-15	Ch2Unknown	KRAS Q61H A-T	Manual	58	ddPCR Supermix for Probes (no dUTP)	1160			63	52	411		8169	0	10	411	8159	0	8580								2260	0.024			0.039	0.009	2.3			3.8	0.9	1	1	3914.9	1470.9	1588					60.6	54.9
1008	09/12/2013 PD	Ch1Unknown	KRAS Q61H A-T	Manual	1.7	ddPCR Supermix for Probes (no dUTP)	34			2.8	1	14	15.0538	9712	0	14	79	9633	0	9726								1680	0.18			0.28	0.07	15			22	8	1	1	3853.4	1334.5	1338.2					2.19	1.28
1008	09/12/2013 PD	Ch2Unknown	KRAS Q61H A-T	Manual	9.6	ddPCR Supermix for Probes (no dUTP)	192			11.9	7.6	79		9647	0	14	79	9633	0	9726								1985	0.18			0.28	0.07	15			22	8	1	1	3645	1441.1	1459					10.7	8.6
[truncated: 12 more columns]

## Sheet: 1009
Well	ExptType	Experiment		Sample	TargetType	Target	Status	Concentration	Supermix	CopiesPer20uLWell	TotalConfMax	TotalConfMin	PoissonConfMax	PoissonConfMin	Positives	FA (%)	Negatives	Ch1+Ch2+	Ch1+Ch2-	Ch1-Ch2+	Ch1-Ch2-	Linkage	AcceptedDroplets	CNV	TotalCNVMax	TotalCNVMin	PoissonCNVMax	PoissonCNVMin	ReferenceCopies	UnknownCopies	Ratio	TotalRatioMax	TotalRatioMin	PoissonRatioMax	PoissonRatioMin	FractionalAbundance	TotalFractionalAbundanceMax	TotalFractionalAbundanceMin	PoissonFractionalAbundanceMax	PoissonFractionalAbundanceMin	ReferenceAssayNumber	TargetAssayNumber	Threshold	MeanAmplitudeofPositives	MeanAmplitudeofNegatives	MeanAmplitudeTotal	ExperimentComments	MergedWells	TotalConfMax68
A02	Absolute Quantification	ABS	1300 (1009)	1300_27/07/2011	Ch1Unknown	KRAS G12S	Manual	0	ddPCR Supermix for Probes (no dUTP)	0			0.34	0	0	0	10369	0	0	2569	7800	0	10369																		1	1	2000	0	798.61	798.61
A02	Absolute Quantification	ABS	1300 (1009)	1300_27/07/2011	Ch2Unknown	KRAS wt	Manual	335	ddPCR Supermix for Probes (no dUTP)	6700			348	322	2569		7800	0	0	2569	7800	0	10369																		1	1	2000	3265.9	1238.9	1741.1
B02	Absolute Quantification	ABS	1300 (1009)	1300_10/08/2011	Ch1Unknown	KRAS G12S	Manual	0	ddPCR Supermix for Probes (no dUTP)	0			0.31	0	0	0	11436	0	0	62	11374	0	11436																		1	1	2000	0	754.92	754.92
B02	Absolute Quantification	ABS	1300 (1009)	1300_10/08/2011	Ch2Unknown	KRAS wt	Manual	6.4	ddPCR Supermix for Probes (no dUTP)	128			8.1	4.9	62		11374	0	0	62	11374	0	11436																		1	1	2000	2732.8	1186.4	1194.8
C02	Absolute Quantification	ABS	1300 (1009)	1300_23/08/2011	Ch1Unknown	KRAS G12S	Manual	0	ddPCR Supermix for Probes (no dUTP)	0			0.31	0	0	0	11422	0	0	183	11239	0	11422																		1	1	2000	0	774.18	774.18
C02	Absolute Quantification	ABS	1300 (1009)	1300_23/08/2011	Ch2Unknown	KRAS wt	Manual	19	ddPCR Supermix for Probes (no dUTP)	380			21.8	16.3	183		11239	0	0	183	11239	0	11422																		1	1	2000	2900.2	1221	1247.9
D02	Absolute Quantification	ABS	1300 (1009)	1300_07/09/2011	Ch1Unknown	KRAS G12S	Manual	0.21	ddPCR Supermix for Probes (no dUTP)	4.2			0.66	0.03	2	0.884956	11426	0	2	224	11202	0	11428								0.009			0.022	0	0.9			2.2	0	1	1	2000	3047.2	792.69	793.08
D02	Absolute Quantification	ABS	1300 (1009)	1300_07/09/2011	Ch2Unknown	KRAS wt	Manual	23.3	ddPCR Supermix for Probes (no dUTP)	466			26.3	20.2	224		11204	0	2	224	11202	0	11428								0.009			0.022	0	0.9			2.2	0	1	1	2000	3270.7	1257.5	1297
D01	Absolute Quantification	ABS	1009	25/11/2013 BL	Ch1Unknown	KRAS G12S	Manual	0.19	ddPCR Supermix for Probes (no dUTP)	3.8			0.62	0.03	2	0.0479501	12176	2	0	4167	8009	0.193	12178								0.00039			0.00099	0	0.039			0.099	0	1	1	2000	3768.7	791.36	791.85
D01	Absolute Quantification	ABS	1009	25/11/2013 BL	Ch2Unknown	KRAS wt	Manual	493	ddPCR Supermix for Probes (no dUTP)	9860			508	478	4169		8009	2	0	4167	8009	0.193	12178								0.00039			0.00099	0	0.039			0.099	0	1	1	2000	3879.9	1242.4	2145.3
H01	Absolute Quantification	ABS	1009	2014-01-21	Ch1Unknown	KRAS G12S	Manual	0.18	ddPCR Supermix for Probes (no dUTP)	3.6			0.56	0.03	2	0.0269578	13385	2	0	7415	5970	0.176	13387								0.00019			0.00047	0	0.018			0.047	0	1	1	2000	2730.4	799.44	799.72
H01	Absolute Quantification	ABS	1009	2014-01-21	Ch2Unknown	KRAS wt	Manual	950	ddPCR Supermix for Probes (no dUTP)	19000			972	928	7417		5970	2	0	7415	5970	0.176	13387								0.00019			0.00047	0	0.018			0.047	0	1	1	2000	4657	1217.5	3123.2
D02	Absolute Quantification	ABS	1009	2014-02-18	Ch1Unknown	KRAS G12S	Manual	0.3	ddPCR Supermix for Probes (no dUTP)	6			0.8	0.07	3	0.0527148	11683	2	1	5686	5997	0.106	11686								0.00038			0.00085	0	0.038			0.085	0	1	1	2000	4619.2	791.84	792.83
D02	Absolute Quantification	ABS	1009	2014-02-18	Ch2Unknown	KRAS wt	Manual	785	ddPCR Supermix for Probes (no dUTP)	15700			806	764	5688		5998	2	1	5686	5997	0.106	11686								0.00038			0.00085	0	0.038			0.085	0	1	1	2000	4175.5	1294.3	2696.7
G01	Absolute Quantification	ABS	1009	2014-02-18	Ch1Unknown	KRAS G12S	Manual	0.29	ddPCR Supermix for Probes (no dUTP)	5.8			0.76	0.07	3	0.0357654	12245	3	0	8382	3863	0.288	12248								0.00021			0.00047	0	0.021			0.047	0	1	1	2000	3120.6	866.49	867.04
G01	Absolute Quantification	ABS	1009	2014-02-18	Ch2Unknown	KRAS wt	Manual	1358	ddPCR Supermix for Probes (no dUTP)	27160			1389	1327	8385		3863	3	0	8382	3863	0.288	12248								0.00021			0.00047	0	0.021			0.047	0	1	1	2000	4706.5	1387.2	3659.6
E02	Absolute Quantification	ABS	1009	18/03/2014 PD	Ch1Unknown	KRAS G12S	Manual	0.09	ddPCR Supermix for Probes (no dUTP)	1.8			0.41	0	1	0.049334	13706	0	1	2026	11680	0	13707								0.0005			0.0015	0	0.05			0.15	0	1	1	2500	9445.9	817.02	817.64
E02	Absolute Quantification	ABS	1009	18/03/2014 PD	Ch2Unknown	KRAS wt	Manual	188	ddPCR Supermix for Probes (no dUTP)	3760			196	180	2026		11681	0	1	2026	11680	0	13707								0.0005			0.0015	0	0.05			0.15	0	1	1	2200	4578.6	1280.1	1767.6
A02	Absolute Quantification	ABS	1009	2015-04-21	Ch1Unknown	KRAS G12S	Manual	0	ddPCR Supermix for Probes (no dUTP)	0			0.33	0	0	0	10657	0	0	897	9760	0	10657																		1	1	2000	0	725.55	725.55
A02	Absolute Quantification	ABS	1009	2015-04-21	Ch2Unknown	KRAS wt	Manual	103	ddPCR Supermix for Probes (no dUTP)	2060			110	97	897		9760	0	0	897	9760	0	10657																		1	1	2000	4711.3	1187.8	1484.4
E02	Absolute Quantification	ABS	1300 (1009)	1300_27/07/2011	Ch1Unknown	KRAS Q61L	Manual	0	ddPCR Supermix for Probes (no dUTP)	0			0.3	0	0	0	11737	0	0	3158	8579	0	11737																		1	1	0	0	1012.2	1012.2
E02	Absolute Quantification	ABS	1300 (1009)	1300_27/07/2011	Ch2Unknown	KRAS wt	Manual	369	ddPCR Supermix for Probes (no dUTP)	7380			382	356	3158		8579	0	0	3158	8579	0	11737																		1	1	0	3595.9	1534.9	2089.5
F02	Absolute Quantification	ABS	1300 (1009)	1300_10/08/2011	Ch1Unknown	KRAS Q61L	Manual	0	ddPCR Supermix for Probes (no dUTP)	0			0.32	0	0	0	10946	0	0	314	10632	0	10946																		1	1	0	0	981.61	981.61
F02	Absolute Quantification	ABS	1300 (1009)	1300_10/08/2011	Ch2Unknown	KRAS wt	Manual	34.2	ddPCR Supermix for Probes (no dUTP)	684			38	30.5	314		10632	0	0	314	10632	0	10946																		1	1	0	3245.8	1464.6	1515.7
G02	Absolute Quantification	ABS	1300 (1009)	1300_23/08/2011	Ch1Unknown	KRAS Q61L	Manual	0	ddPCR Supermix for Probes (no dUTP)	0			0.27	0	0	0	13085	0	0	925	12160	0	13085																		1	1	0	0	992.87	992.87
G02	Absolute Quantification	ABS	1300 (1009)	1300_23/08/2011	Ch2Unknown	KRAS wt	Manual	86	ddPCR Supermix for Probes (no dUTP)	1720			92	81	925		12160	0	0	925	12160	0	13085																		1	1	0	3156.5	1475.8	1594.6
H02	Absolute Quantification	ABS	1300 (1009)	1300_07/09/2011	Ch1Unknown	KRAS Q61L	Manual	0	ddPCR Supermix for Probes (no dUTP)	0			0.3	0	0	0	11847	0	0	709	11138	0	11847																		1	1	0	0	970.06	970.06
H02	Absolute Quantification	ABS	1300 (1009)	1300_07/09/2011	Ch2Unknown	KRAS wt	Manual	73	ddPCR Supermix for Probes (no dUTP)	1460			78	67	709		11138	0	0	709	11138	0	11847																		1	1	0	3077.3	1442.6	1540.4
E01	Absolute Quantification	ABS	1009	2013-12-23	Ch1Unknown	KRAS Q61R	Manual	0.18	ddPCR Supermix for Probes (no dUTP)	3.6			0.57	0.03	2	0.0407166	13328	2	0	4908	8420	0.177	13330								0.00033			0.00083	0	0.033			0.082	0	1	1	2505	3465.2	1080.5	1080.8
E01	Absolute Quantification	ABS	1009	2013-12-23	Ch2Unknown	KRAS wt	Manual	540	ddPCR Supermix for Probes (no dUTP)	10800			556	525	4910		8420	2	0	4908	8420	0.177	13330								0.00033			0.00083	0	0.033			0.082	0	1	1	2000	4499.2	1426.7	2558.4
A02	Absolute Quantification	ABS	1009	2014-01-21	Ch1Unknown	KRAS Q61R	Manual	0	ddPCR Supermix for Probes (no dUTP)	0			0.26	0	0	0	13648	0	0	6066	7582	0	13648																		1	1	2505	0	1150.3	1150.3
A02	Absolute Quantification	ABS	1009	2014-01-21	Ch2Unknown	KRAS wt	Manual	692	ddPCR Supermix for Probes (no dUTP)	13840			709	674	6066		7582	0	0	6066	7582	0	13648																		1	1	2000	4957.3	1401.6	2982
E02	Absolute Quantification	ABS	1009	2014-02-18	Ch1Unknown	KRAS Q61R	Manual	0.09	ddPCR Supermix for Probes (no dUTP)	1.8			0.42	0	1	0.0184809	13432	1	0	5409	8023	0.0876	13433								0.00014			0.00049	0	0.014			0.049	0	1	1	2505	2654.9	1098.9	1099
E02	Absolute Quantification	ABS	1009	2014-02-18	Ch2Unknown	KRAS wt	Manual	606	ddPCR Supermix for Probes (no dUTP)	12120			623	590	5410		8023	1	0	5409	8023	0.0876	13433								0.00014			0.00049	0	0.014			0.049	0	1	1	2000	4420.8	1451.2	2647.2
A03	Absolute Quantification	ABS	1009	18/03/2014 PD	Ch1Unknown	KRAS Q61R	Manual	0.35	ddPCR Supermix for Probes (no dUTP)	7			0.77	0.12	5	0.0795165	16613	5	0	6278	10335	0.354	16618								0.0006			0.0012	0.0001	0.06			0.12	0.01	1	1	2500	4420.8	1110	1111
A03	Absolute Quantification	ABS	1009	18/03/2014 PD	Ch2Unknown	KRAS wt	Manual	559	ddPCR Supermix for Probes (no dUTP)	11180			573	545	6283		10335	5	0	6278	10335	0.354	16618								0.0006			0.0012	0.0001	0.06			0.12	0.01	1	1	2200	4910	1525.2	2805
B02	Absolute Quantification	ABS	1009	2015-04-21	Ch1Unknown	KRAS Q61R	Manual	0.17	ddPCR Supermix for Probes (no dUTP)	3.4			0.56	0.03	2	0.139373	13551	1	1	1432	12119	0.0766	13553								0.0013			0.0033	0	0.13			0.33	0	1	1	2500	5717.9	866.24	866.96
B02	Absolute Quantification	ABS	1009	2015-04-21	Ch2Unknown	KRAS wt	Manual	131	ddPCR Supermix for Probes (no dUTP)	2620			138	125	1433		12120	1	1	1432	12119	0.0766	13553								0.0013			0.0033	0	0.13			0.33	0	1	1	2200	5001.1	1373.6	1757.2
E01	Absolute Quantification	ABS	1300 (1009)	1300_27/07/2011	Ch1Unknown	NRAS G12D	Manual	0.1	ddPCR Supermix for Probes (no dUTP)	2			0.48	0	1	0.0318878	11708	1	0	3134	8574	0.1	11709								0.00027			0.00092	0	0.027			0.092	0	1	1	2000	7439.2	965.45	966.01
E01	Absolute Quantification	ABS	1300 (1009)	1300_27/07/2011	Ch2Unknown	NRAS wt	Manual	367	ddPCR Supermix for Probes (no dUTP)	7340			380	354	3135		8574	1	0	3134	8574	0.1	11709								0.00027			0.00092	0	0.027			0.092	0	1	1	2000	4505.9	1167	2061
F01	Absolute Quantification	ABS	1300 (1009)	1300_10/08/2011	Ch1Unknown	NRAS G12D	Manual	0	ddPCR Supermix for Probes (no dUTP)	0			0.35	0	0	0	9992	0	0	290	9702	0	9992																		1	1	2000	0	888.08	888.08
F01	Absolute Quantification	ABS	1300 (1009)	1300_10/08/2011	Ch2Unknown	NRAS wt	Manual	34.7	ddPCR Supermix for Probes (no dUTP)	694			38.6	30.7	290		9702	0	0	290	9702	0	9992																		1	1	2000	4049.7	1091	1176.9
G01	Absolute Quantification	ABS	1300 (1009)	1300_23/08/2011	Ch1Unknown	NRAS G12D	Manual	0	ddPCR Supermix for Probes (no dUTP)	0			0.33	0	0	0	10591	0	0	802	9789	0	10591																		1	1	2000	0	922.32	922.32
G01	Absolute Quantification	ABS	1300 (1009)	1300_23/08/2011	Ch2Unknown	NRAS wt	Manual	93	ddPCR Supermix for Probes (no dUTP)	1860			99	86	802		9789	0	0	802	9789	0	10591																		1	1	2000	3923.1	1123.4	1335.4
H01	Absolute Quantification	ABS	1300 (1009)	1300_07/09/2011	Ch1Unknown	NRAS G12D	Manual	0	ddPCR Supermix for Probes (no dUTP)	0			0.32	0	0	0	10998	0	0	565	10433	0	10998																		1	1	2000	0	922.71	922.71
H01	Absolute Quantification	ABS	1300 (1009)	1300_07/09/2011	Ch2Unknown	NRAS wt	Manual	62	ddPCR Supermix for Probes (no dUTP)	1240			67	57	565		10433	0	0	565	10433	0	10998																		1	1	2000	3747.7	1122.6	1257.4
H02	Absolute Quantification	ABS	1009	25/11/2013 BL	Ch1Unknown	NRAS G12D	Manual	0.28	ddPCR Supermix for Probes (no dUTP)	5.6			0.66	0.08	4	0.0642055	16745	4	0	6222	10523	0.281	16749								0.0005			0.001	0	0.05			0.1	0	1	1	2500	4733.8	1020.9	1021.8
H02	Absolute Quantification	ABS	1009	25/11/2013 BL	Ch2Unknown	NRAS wt	Manual	547	ddPCR Supermix for Probes (no dUTP)	10940			561	533	6226		10523	4	0	6222	10523	0.281	16749								0.0005			0.001	0	0.05			0.1	0	1	1	2200	5249.7	1200.6	2705.8
G01	Absolute Quantification	ABS	1009	2013-12-23	Ch1Unknown	NRAS G12D	Manual	0.17	ddPCR Supermix for Probes (no dUTP)	3.4			0.55	0.03	2	0.0387522	13646	2	0	5157	8489	0.172	13648								0.00031			0.00078	0	0.031			0.078	0	1	1	2000	4622.1	948.13	948.67
G01	Absolute Quantification	ABS	1009	2013-12-23	Ch2Unknown	NRAS wt	Manual	559	ddPCR Supermix for Probes (no dUTP)	11180			574	543	5159		8489	2	0	5157	8489	0.172	13648								0.00031			0.00078	0	0.031			0.078	0	1	1	2000	5685.1	1072	2815.8
C02	Absolute Quantification	ABS	1009	2014-01-21	Ch1Unknown	NRAS G12D	Manual	0.08	ddPCR Supermix for Probes (no dUTP)	1.6			0.41	0	1	0.0163239	13857	1	0	6124	7733	0.0849	13858								0.00012			0.00042	0	0.012			0.042	0	1	1	2000	3004.6	983.71	983.86
C02	Absolute Quantification	ABS	1009	2014-01-21	Ch2Unknown	NRAS wt	Manual	686	ddPCR Supermix for Probes (no dUTP)	13720			704	669	6125		7733	1	0	6124	7733	0.0849	13858								0.00012			0.00042	0	0.012			0.042	0	1	1	2000	5447.9	1082.7	3012
C03	Absolute Quantification	ABS	1009	2014-02-18	Ch1Unknown	NRAS G12D	Manual	0.27	ddPCR Supermix for Probes (no dUTP)	5.4			0.73	0.06	3	0.0354736	12888	3	0	8451	4437	0.274	12891								0.00022			0.00048	0	0.022			0.048	0	1	1	2000	2972	1128	1128.4
C03	Absolute Quantification	ABS	1009	2014-02-18	Ch2Unknown	NRAS wt	Manual	1255	ddPCR Supermix for Probes (no dUTP)	25100			1283	1227	8454		4437	3	0	8451	4437	0.274	12891								0.00022			0.00048	0	0.022			0.048	0	1	1	2000	5312.2	1267.5	3920
C03	Absolute Quantification	ABS	1009	18/03/2014 PD	Ch1Unknown	NRAS G12D	Manual	0.1	ddPCR Supermix for Probes (no dUTP)	2			0.49	0	1	0.364964	11489	1	0	272	11217	0.102	11490								0.004			0.012	0	0.4			1.2	0	1	1	2000	2212.5	882.61	882.72
C03	Absolute Quantification	ABS	1009	18/03/2014 PD	Ch2Unknown	NRAS wt	Manual	28.3	ddPCR Supermix for Probes (no dUTP)	566			31.7	24.9	273		11217	1	0	272	11217	0.102	11490								0.004			0.012	0	0.4			1.2	0	1	1	2000	4847.3	1063.2	1153.1
E02	Absolute Quantification	ABS	1009	2015-04-21	Ch1Unknown	NRAS G12D	Manual	0	ddPCR Supermix for Probes (no dUTP)	0			0.29	0	0	0	12165	0	0	1509	10656	0	12165																		1	1	2000	0	771.08	771.08
E02	Absolute Quantification	ABS	1009	2015-04-21	Ch2Unknown	NRAS wt	Manual	156	ddPCR Supermix for Probes (no dUTP)	3120			164	148	1509		10656	0	0	1509	10656	0	12165																		1	1	2000	4900.1	1083.5	1556.9
A01	Absolute Quantification	ABS	1300 (1009)	1300_27/07/2011	Ch1Unknown	NRAS G12C	Manual	0.6	ddPCR Supermix for Probes (no dUTP)	12			1.4	0.2	5	0.181094	9202	2	3	2754	6448	0.0918	9207								0.0015			0.0029	0.0001	0.15			0.29	0.01	1	1	2000	4998.8	954.71	956.9
A01	Absolute Quantification	ABS	1300 (1009)	1300_27/07/2011	Ch2Unknown	NRAS wt	Manual	419	ddPCR Supermix for Probes (no dUTP)	8380			434	403	2756		6451	2	3	2754	6448	0.0918	9207								0.0015			0.0029	0.0001	0.15			0.29	0.01	1	1	1800	4722.1	1051.6	2150.3
B01	Absolute Quantification	ABS	1300 (1009)	1300_10/08/2011	Ch1Unknown	NRAS G12C	Manual	0.3	ddPCR Supermix for Probes (no dUTP)	6			0.79	0.07	3	0.519931	11914	0	3	574	11340	0	11917								0.005			0.011	0	0.5			1.1	0	1	1	2000	5161	920.85	921.92
B01	Absolute Quantification	ABS	1300 (1009)	1300_10/08/2011	Ch2Unknown	NRAS wt	Manual	58.1	ddPCR Supermix for Probes (no dUTP)	1162			62.8	53.3	574		11343	0	3	574	11340	0	11917								0.005			0.011	0	0.5			1.1	0	1	1	1800	3791.5	1027.4	1160.5
C01	Absolute Quantification	ABS	1300 (1009)	1300_23/08/2011	Ch1Unknown	NRAS G12C	Manual	0.1	ddPCR Supermix for Probes (no dUTP)	2			0.47	0	1	0.0986193	11867	0	1	1013	10854	0	11868								0.0009			0.0032	0	0.09			0.32	0	1	1	2000	4548.7	928.74	929.05
C01	Absolute Quantification	ABS	1300 (1009)	1300_23/08/2011	Ch2Unknown	NRAS wt	Manual	105	ddPCR Supermix for Probes (no dUTP)	2100			111	99	1013		10855	0	1	1013	10854	0	11868								0.0009			0.0032	0	0.09			0.32	0	1	1	1800	3455.3	1031	1237.9
D01	Absolute Quantification	ABS	1300 (1009)	1300_07/09/2011	Ch1Unknown	NRAS G12C	Manual	0	ddPCR Supermix for Probes (no dUTP)	0			0.3	0	0	0	11577	0	0	658	10919	0	11577																		1	1	2000	0	938.33	938.33
D01	Absolute Quantification	ABS	1300 (1009)	1300_07/09/2011	Ch2Unknown	NRAS wt	Manual	69	ddPCR Supermix for Probes (no dUTP)	1380			74	64	658		10919	0	0	658	10919	0	11577																		1	1	1800	3267.6	1048.6	1174.8
B02	Absolute Quantification	ABS	1009	25/11/2013 BL	Ch1Unknown	NRAS G12C	Manual	0.6	ddPCR Supermix for Probes (no dUTP)	12			1.2	0.2	5	2.00803	10651	0	5	244	10407	0	10656								0.02			0.039	0.002	2			3.8	0.2	1	1	2000	6988.6	921.14	923.99
B02	Absolute Quantification	ABS	1009	25/11/2013 BL	Ch2Unknown	NRAS wt	Manual	27.3	ddPCR Supermix for Probes (no dUTP)	546			30.7	23.8	244		10412	0	5	244	10407	0	10656								0.02			0.039	0.002	2			3.8	0.2	1	1	2000	4166.7	1023	1095
C02	Absolute Quantification	ABS	1009	2013-12-23	Ch1Unknown	NRAS G12C	Manual	0.35	ddPCR Supermix for Probes (no dUTP)	7			0.92	0.08	3	1.63934	10196	0	3	180	10016	0	10199								0.017			0.037	0	1.6			3.6	0	1	1	2000	7147.5	947.68	949.5
C02	Absolute Quantification	ABS	1009	2013-12-23	Ch2Unknown	NRAS wt	Manual	20.9	ddPCR Supermix for Probes (no dUTP)	418			24	17.9	180		10019	0	3	180	10016	0	10199								0.017			0.037	0	1.6			3.6	0	1	1	2000	4684	1046.7	1110.9
D02	Absolute Quantification	ABS	1009	2014-01-21	Ch1Unknown	NRAS G12C	Manual	1.3	ddPCR Supermix for Probes (no dUTP)	26			2.1	0.7	13	1.45251	11785	1	12	881	10904	0.00304	11798								0.014			0.022	0.006	1.4			2.2	0.6	1	1	2000	6574.5	957.74	963.93
D02	Absolute Quantification	ABS	1009	2014-01-21	Ch2Unknown	NRAS wt	Manual	91	ddPCR Supermix for Probes (no dUTP)	1820			97	85	882		10916	1	12	881	10904	0.00304	11798								0.014			0.022	0.006	1.4			2.2	0.6	1	1	2000	4674.9	1055.8	1326.4
C02	Absolute Quantification	ABS	1009	2014-02-18	Ch1Unknown	NRAS G12C	Manual	1.4	ddPCR Supermix for Probes (no dUTP)	28			2.2	0.8	14	0.26445	11929	8	6	5272	6657	0.32	11943								0.002			0.0031	0.0009	0.2			0.31	0.09	1	1	2000	5960	896.89	902.82
C02	Absolute Quantification	ABS	1009	2014-02-18	Ch2Unknown	NRAS wt	Manual	687	ddPCR Supermix for Probes (no dUTP)	13740			705	668	5280		6663	8	6	5272	6657	0.32	11943								0.002			0.0031	0.0009	0.2			0.31	0.09	1	1	2000	4841.6	1017.6	2708.2
D03	Absolute Quantification	ABS	1009	2014-03-18	Ch1Unknown	NRAS G12C	Manual	4.1	ddPCR Supermix for Probes (no dUTP)	82			5.2	3.1	60	0.890604	17235	30	30	6647	10588	0.76	17295								0.0071			0.0089	0.0053	0.71			0.89	0.53	1	1	2500	5632	1013.2	1029.2
D03	Absolute Quantification	ABS	1009	2014-03-18	Ch2Unknown	NRAS wt	Manual	574	ddPCR Supermix for Probes (no dUTP)	11480			588	560	6677		10618	30	30	6647	10588	0.76	17295								0.0071			0.0089	0.0053	0.71			0.89	0.53	1	1	2200	4799.1	1145.6	2556.1
F02	Absolute Quantification	ABS	1009	18/03/2014 PD	Ch1Unknown	NRAS G12C	Manual	1.4	ddPCR Supermix for Probes (no dUTP)	28			2.3	0.8	15	0.288018	12301	6	9	5187	7114	0	12316								0.0022			0.0034	0.0011	0.22			0.34	0.11	1	1	2000	6646.1	992.48	999.36
F02	Absolute Quantification	ABS	1009	18/03/2014 PD	Ch2Unknown	NRAS wt	Manual	644	ddPCR Supermix for Probes (no dUTP)	12880			662	627	5193		7123	6	9	5187	7114	0	12316								0.0022			0.0034	0.0011	0.22			0.34	0.11	1	1	2000	4976.4	1125.2	2749
G02	Absolute Quantification	ABS	1009	07/04/2014 PD	Ch1Unknown	NRAS G12C	Manual	13.2	ddPCR Supermix for Probes (no dUTP)	264			15.4	11	135	4.96872	11972	45	90	2537	9435	2.02	12107								0.047			0.055	0.039	4.5			5.2	3.7	1	1	2000	5081.8	947.12	993.22
G02	Absolute Quantification	ABS	1009	07/04/2014 PD	Ch2Unknown	NRAS wt	Manual	282	ddPCR Supermix for Probes (no dUTP)	5640			293	271	2582		9525	45	90	2537	9435	2.02	12107								0.047			0.055	0.039	4.5			5.2	3.7	1	1	2000	4256.6	1074.9	1753.4
D02	Absolute Quantification	ABS	1009	2015-04-21	Ch1Unknown	NRAS G12C	Manual	27.6	ddPCR Supermix for Probes (no dUTP)	552			30.8	24.4	286	17.72	12043	41	245	1287	10756	1.12	12329								0.206			0.232	0.18	17.1			18.9	15.3	1	1	2000	6506	819.61	951.52
D02	Absolute Quantification	ABS	1009	2015-04-21	Ch2Unknown	NRAS wt	Manual	134	ddPCR Supermix for Probes (no dUTP)	2680			141	127	1328		11001	41	245	1287	10756	1.12	12329								0.206			0.232	0.18	17.1			18.9	15.3	1	1	2000	4835.9	1028.1	1438.3
[truncated: 15 more columns]

## Sheet: 1010
Well	ExptType	Experiment	PT ID	Sample	TargetType	Target	Status	Conc(copies/L)	Supermix	Copies/20LWell	TotalConfMax	TotalConfMin	PoissonConfMax	PoissonConfMin	Positives	FA (%)	Negatives	Ch1+Ch2+	Ch1+Ch2-	Ch1-Ch2+	Ch1-Ch2-	Linkage	AcceptedDroplets	CNV	TotalCNVMax	TotalCNVMin	PoissonCNVMax	PoissonCNVMin	ReferenceCopies	UnknownCopies	Threshold	Ratio	TotalRatioMax	TotalRatioMin	PoissonRatioMax	PoissonRatioMin	FractionalAbundance	TotalFractionalAbundanceMax	TotalFractionalAbundanceMin	PoissonFractionalAbundanceMax	PoissonFractionalAbundanceMin	ReferenceAssayNumber	TargetAssayNumber	MeanAmplitudeofPositives	MeanAmplitudeofNegatives	MeanAmplitudeTotal	ExperimentComments	MergedWells	TotalConfMax68
A01	Absolute Quantification	ABS	1010	1010_SSGCC_02/03/2009	Ch1Unknown	KRAS G12D	Manual	0	ddPCR Supermix for Probes (no dUTP)	0			0.25	0	0	0	13872	0	0	162	13710	0	13872
A01	Absolute Quantification	ABS	1010	1010_SSGCC_02/03/2009	Ch2Unknown	KRAS wt	Manual	13.8	ddPCR Supermix for Probes (no dUTP)	276			16	11.7	162		13710	0	0	162	13710	0	13872
B01	Absolute Quantification	ABS	1010	2013-12-10	Ch1Unknown	KRAS G12D	Manual	1.3	ddPCR Supermix for Probes (no dUTP)	26			2.3	0.7	11	1.52144	9675	1	10	711	8964	0.0251	9686								703	0.015			0.024	0.006	1.5			2.3	0.6	1	1	2210.9	556.79	558.67
B01	Absolute Quantification	ABS	1010	2013-12-10	Ch2Unknown	KRAS wt	Manual	90	ddPCR Supermix for Probes (no dUTP)	1800			96	83	712		8974	1	10	711	8964	0.0251	9686								1583	0.015			0.024	0.006	1.5			2.3	0.6	1	1	2436.1	1086.5	1185.7
A01	Absolute Quantification	ABS	1010	2014-01-10	Ch1Unknown	KRAS G12D	Manual	1.9	ddPCR Supermix for Probes (no dUTP)	38			3.1	1.1	14	2.2293	8675	4	10	610	8065	0.439	8689								661	0.022			0.034	0.01	2.2			3.3	1	1	1	1553.7	524.72	526.37
A01	Absolute Quantification	ABS	1010	2014-01-10	Ch2Unknown	KRAS wt	Manual	86	ddPCR Supermix for Probes (no dUTP)	1720			93	79	614		8075	4	10	610	8065	0.439	8689								1531	0.022			0.034	0.01	2.2			3.3	1	1	1	2430.1	1065.2	1161.6
E01	Absolute Quantification	ABS	1010	2014-02-07	Ch1Unknown	KRAS G12D	Manual	6.3	ddPCR Supermix for Probes (no dUTP)	126			8.3	4.6	47	7.33229	8792	0	47	594	8198	0	8839								1256	0.077			0.1	0.054	7.1			9.1	5.1	1	1	2732.8	579.67	591.12
E01	Absolute Quantification	ABS	1010	2014-02-07	Ch2Unknown	KRAS wt	Manual	82	ddPCR Supermix for Probes (no dUTP)	1640			88	75	594		8245	0	47	594	8198	0	8839								1528	0.077			0.1	0.054	7.1			9.1	5.1	1	1	2410.8	979.12	1075.3
D01	Absolute Quantification	ABS	1010	2014-03-07	Ch1Unknown	KRAS G12D	Manual	5.2	ddPCR Supermix for Probes (no dUTP)	104			7	3.8	41	5.31088	9219	0	41	731	8488	0	9260								1236	0.054			0.071	0.037	5.1			6.7	3.6	1	1	3159.5	600.81	612.14
D01	Absolute Quantification	ABS	1010	2014-03-07	Ch2Unknown	KRAS wt	Manual	97	ddPCR Supermix for Probes (no dUTP)	1940			104	90	731		8529	0	41	731	8488	0	9260								1544	0.054			0.071	0.037	5.1			6.7	3.6	1	1	2393.3	1066.4	1171.1
H02	Absolute Quantification	ABS	1010	2014-04-04	Ch1Unknown	KRAS G12D	OK	7.5	ddPCR Supermix for Probes (no dUTP)	150			9.2	5.9	82	7.59963	12902	1	81	996	11906	0	12984								1626	0.079			0.097	0.061	7.3			8.9	5.8	1	1	3876	838.12	857.31
H02	Absolute Quantification	ABS	1010	2014-04-04	Ch2Unknown	KRAS wt	OK	94	ddPCR Supermix for Probes (no dUTP)	1880			100	88	997		11987	1	81	996	11906	0	12984								1687	0.079			0.097	0.061	7.3			8.9	5.8	1	1	2665.7	1117.1	1236
E02	Absolute Quantification	ABS	1010	2014-05-09	Ch1Unknown	KRAS G12D	OK	6.2	ddPCR Supermix for Probes (no dUTP)	124			7.8	4.8	70	6.09225	13262	2	68	1077	12185	0	13332								1417	0.062			0.078	0.047	5.9			7.2	4.5	1	1	3168.3	731.18	743.98
E02	Absolute Quantification	ABS	1010	2014-05-09	Ch2Unknown	KRAS wt	OK	99	ddPCR Supermix for Probes (no dUTP)	1980			105	93	1079		12253	2	68	1077	12185	0	13332								1596	0.062			0.078	0.047	5.9			7.2	4.5	1	1	2529.3	1068.4	1186.7
G02	Absolute Quantification	ABS	1010	2014-06-04	Ch1Unknown	KRAS G12D	OK	7.2	ddPCR Supermix for Probes (no dUTP)	144			8.8	5.8	90	8.64553	14714	4	86	947	13767	0	14804								1163	0.092			0.112	0.072	8.4			10.1	6.7	1	1	2725.7	613.11	625.95
G02	Absolute Quantification	ABS	1010	2014-06-04	Ch2Unknown	KRAS wt	OK	78.1	ddPCR Supermix for Probes (no dUTP)	1562			83.1	73.2	951		13853	4	86	947	13767	0	14804								1377	0.092			0.112	0.072	8.4			10.1	6.7	1	1	2203	924.66	1006.8
F01	Absolute Quantification	ABS	1010	2014-07-16	Ch1Unknown	KRAS G12D	Manual	7.3	ddPCR Supermix for Probes (no dUTP)	146			9.5	5.5	53	20.1521	8489	0	53	210	8279	0	8542								1559	0.25			0.33	0.17	20			24.9	15.2	1	1	3775.3	854.26	872.38
F01	Absolute Quantification	ABS	1010	2014-07-16	Ch2Unknown	KRAS wt	Manual	29.3	ddPCR Supermix for Probes (no dUTP)	586			33.3	25.3	210		8332	0	53	210	8279	0	8542								1895	0.25			0.33	0.17	20			24.9	15.2	1	1	2934.3	1394.5	1432.4
[truncated: 15 more columns]

## Sheet: 1011
Well	ExptType	Experiment	Sample	Date	TargetType	Target	Status	Conc(copies/L)	Supermix	Copies/20LWell	TotalConfMax	TotalConfMin	PoissonConfMax	PoissonConfMin	Positives	FA (%)	Negatives	Ch1+Ch2+	Ch1+Ch2-	Ch1-Ch2+	Ch1-Ch2-	Linkage	AcceptedDroplets	CNV	TotalCNVMax	TotalCNVMin	PoissonCNVMax	PoissonCNVMin	ReferenceCopies	UnknownCopies	Threshold	Ratio	TotalRatioMax	TotalRatioMin	PoissonRatioMax	PoissonRatioMin	FractionalAbundance	TotalFractionalAbundanceMax	TotalFractionalAbundanceMin	PoissonFractionalAbundanceMax	PoissonFractionalAbundanceMin	ReferenceAssayNumber	TargetAssayNumber	MeanAmplitudeofPositives	MeanAmplitudeofNegatives	MeanAmplitudeTotal	ExperimentComments	MergedWells	TotalConfMax68
B01	Absolute Quantification	ABS	1011	15/01/2014 BL	Ch1Unknown	KRAS G12S	Manual	3.8	ddPCR Supermix for Probes (no dUTP)	76			5.4	2.5	28	5.21415	8703	0	28	509	8194	0	8731								703	0.053			0.074	0.033	5.1			6.9	3.2	1	1	1775.3	364.49	369.01
B01	Absolute Quantification	ABS	1011	15/01/2014 BL	Ch2Unknown	KRAS wt	Manual	71	ddPCR Supermix for Probes (no dUTP)	1420			77	65	509		8222	0	28	509	8194	0	8731								1287	0.053			0.074	0.033	5.1			6.9	3.2	1	1	1824.3	975.38	1024.9
E01	Absolute Quantification	ABS	1011	2014-02-17	Ch1Unknown	KRAS G12S	OK	5.7	ddPCR Supermix for Probes (no dUTP)	114			7.3	4.3	57	5.67729	11830	2	55	945	10885	0	11887								1313	0.058			0.073	0.042	5.5			6.9	4.1	1	1	3157.3	679.77	691.65
E01	Absolute Quantification	ABS	1011	2014-02-17	Ch2Unknown	KRAS wt	OK	98	ddPCR Supermix for Probes (no dUTP)	1960			104	91	947		10940	2	55	945	10885	0	11887								1674	0.058			0.073	0.042	5.5			6.9	4.1	1	1	2545.9	1119.9	1233.5
C01	Absolute Quantification	ABS	1011	13/03/2014 PD	Ch1Unknown	KRAS G12S	OK	8.9	ddPCR Supermix for Probes (no dUTP)	178			10.9	7.1	86	9.09091	11327	9	77	851	10476	0.283	11413								1084	0.097			0.118	0.075	8.8			10.6	7	1	1	2799.8	504.56	521.85
C01	Absolute Quantification	ABS	1011	13/03/2014 PD	Ch2Unknown	KRAS wt	OK	92	ddPCR Supermix for Probes (no dUTP)	1840			98	86	860		10553	9	77	851	10476	0.283	11413								1398	0.097			0.118	0.075	8.8			10.6	7	1	1	2159.9	975.75	1065
[truncated: 15 more columns]

## Sheet: 1012
Well	ExptType	Experiment	PT ID	Sample	TargetType	Target	Status	Conc(copies/L)	Supermix	Copies/20LWell	TotalConfMax	TotalConfMin	PoissonConfMax	PoissonConfMin	Positives	FA (%)	Negatives	Ch1+Ch2+	Ch1+Ch2-	Ch1-Ch2+	Ch1-Ch2-	Linkage	AcceptedDroplets	CNV	TotalCNVMax	TotalCNVMin	PoissonCNVMax	PoissonCNVMin	ReferenceCopies	UnknownCopies	Threshold	Ratio	TotalRatioMax	TotalRatioMin	PoissonRatioMax	PoissonRatioMin	FractionalAbundance	TotalFractionalAbundanceMax	TotalFractionalAbundanceMin	PoissonFractionalAbundanceMax	PoissonFractionalAbundanceMin	ReferenceAssayNumber	TargetAssayNumber	MeanAmplitudeofPositives	MeanAmplitudeofNegatives	MeanAmplitudeTotal	ExperimentComments	MergedWells	TotalConfMax68
G01	Absolute Quantification	ABS	1012	14/02/2014 BL	Ch1Unknown	KRAS G12S	Manual	6.2	ddPCR Supermix for Probes (no dUTP)	124			8	4.6	51	7.85824	9705	1	50	597	9108	0	9756								1272	0.083			0.107	0.059	7.7			9.7	5.6	1	1	2524.6	546.35	556.69
G01	Absolute Quantification	ABS	1012	14/02/2014 BL	Ch2Unknown	KRAS wt	Manual	74	ddPCR Supermix for Probes (no dUTP)	1480			80	68	598		9158	1	50	597	9108	0	9756								1449	0.083			0.107	0.059	7.7			9.7	5.6	1	1	2279.5	929.58	1012.3
H01	Absolute Quantification	ABS	1012	17/03/2014 PD	Ch1Unknown	KRAS G12S	OK	7.1	ddPCR Supermix for Probes (no dUTP)	142			9.1	5.5	63	8.81119	10360	3	60	649	9711	0	10423								1110	0.094			0.118	0.069	8.6			10.6	6.5	1	1	2904.4	573.31	587.4
H01	Absolute Quantification	ABS	1012	17/03/2014 PD	Ch2Unknown	KRAS wt	OK	76	ddPCR Supermix for Probes (no dUTP)	1520			82	70	652		9771	3	60	649	9711	0	10423								1423	0.094			0.118	0.069	8.6			10.6	6.5	1	1	2227.4	932.18	1013.2
B02	Absolute Quantification	ABS	1012	14/02/2014 BL	Ch1Unknown	NRAS G12D	OK	2	ddPCR Supermix for Probes (no dUTP)	40			3	1.3	21	2.05882	12162	0	21	999	11163	0	12183								1239	0.02			0.029	0.011	2			2.8	1.1	1	1	3729.5	774.93	780.02
B02	Absolute Quantification	ABS	1012	14/02/2014 BL	Ch2Unknown	NRAS wt	OK	101	ddPCR Supermix for Probes (no dUTP)	2020			107	94	999		11184	0	21	999	11163	0	12183								1745	0.02			0.029	0.011	2			2.8	1.1	1	1	2715.9	1160.1	1287.7
C02	Absolute Quantification	ABS	1012	17/03/2014 PD	Ch1Unknown	NRAS G12D	OK	4.4	ddPCR Supermix for Probes (no dUTP)	88			5.8	3.3	51	4.0412	13520	1	50	1210	12310	0	13571								1349	0.04			0.052	0.029	3.9			4.9	2.8	1	1	3158.3	747.4	756.46
C02	Absolute Quantification	ABS	1012	17/03/2014 PD	Ch2Unknown	NRAS wt	OK	110	ddPCR Supermix for Probes (no dUTP)	2200			116	104	1211		12360	1	50	1210	12310	0	13571								1678	0.04			0.052	0.029	3.9			4.9	2.8	1	1	2616.7	1126.6	1259.6
[truncated: 15 more columns]

[truncated: 6 more sheets: 1013, 1016, 1017, 1019, 1020, 1021]
